# Supplementary material
Source: PubMed Central journal article supplement (PMC3585073)
Supplement: supp_M112.410092_jbc.M112.410092-1.pdf [file supp_M112.410092_jbc.M112.410092-1.pdf]

**Supplemental Table 1.** List of 432 genes of interest prior to refinement. The table includes the Entrez gene identifier, the Dharmacon library from which the initial hit was identified, the gene symbol, the mean fold change in secreted ApoA-I that resulted from siRNA knockdown, the Z-score associated with the siRNA knockdown, a brief description of the known function of the gene. Genes are listed in alphabetical order by gene symbol. ROHG = rest of human genome, GPCR = G-protein coupled receptor

| Entrez Gene | Library         | Gene Symbol | Fold $\Delta$ ApoA-I | Z-Score | Gene Summary                                                                                                                                                                                                                                      |
|-------------|-----------------|-------------|----------------------|---------|---------------------------------------------------------------------------------------------------------------------------------------------------------------------------------------------------------------------------------------------------|
| 13          | Human Druggable | AADAC       | 2.33                 | 3.09    | Arylacetamide deacetylase, may play a role in protein amino acid deacetylation and lipid metabolic process                                                                                                                                        |
| 16          | ROHG            | AARS        | 1.90                 | 2.21    | Alanyl-tRNA synthetase, a tRNA binding protein that is involved in humoral immune response and tRNA processing                                                                                                                                    |
| 27252       | ROHG            | AB026190    | 2.03                 | 2.17    | Kelch-like 20, binds actin filaments, forms a complex with CUL3 and ROC1 to form an E3 ubiquitin ligase, mediating ubiquitination of DAPK1 and subsequently controlling cellular responses to interferon                                          |
| 4363        | Human Druggable | ABCC1       | 2.16                 | 2.70    | ATP-binding cassette subfamily C member 1, a multidrug transporter that acts in chemotaxis, apoptosis, and food intake                                                                                                                            |
| 215         | Human Druggable | ABCD1       | 1.91                 | 2.11    | ATP-binding cassette subfamily D (ALD) member 1, involved in the transport of acyl CoA esters across the peroxisomal membrane                                                                                                                     |
| 225         | ROHG            | ABCD2       | 2.03                 | 2.52    | ATP-binding cassette sub-family D member 2, an ABC transporter that plays a role in very long chain fatty acid metabolism, regulates NF-kappaB, AP-1, and C/EBP transcription factors activities, nitric oxide synthesis, and cytokine production |
| 171586      | Human Druggable | ABHD3       | 1.90                 | 2.07    | Abhydrolase domain containing 3 (lung alpha/beta hydrolase 3), a member of the alpha/beta hydrolase family of enzymes                                                                                                                             |
| 31          | Human Druggable | ACACA       | 1.92                 | 2.10    | Acetyl-Coenzyme A carboxylase alpha, plays a role in fatty acid biosynthetic process, regulates apoptosis, cell proliferation, cell growth, insulin secretion, and glycogen biosynthetic process;                                                 |

| Entrez Gene | Library         | Gene Symbol | Fold $\Delta$ ApoA-I | Z-Score | Gene Summary                                                                                                                                                                                                                                             |
|-------------|-----------------|-------------|----------------------|---------|----------------------------------------------------------------------------------------------------------------------------------------------------------------------------------------------------------------------------------------------------------|
| 37          | Human Druggable | ACADVL      | 1.87                 | 2.08    | Acyl-Coenzyme A dehydrogenase very long chain, acts in fatty acid beta-oxidation                                                                                                                                                                         |
| 84320       | ROHG            | ACBD6       | 2.42                 | 2.98    | Acyl-Coenzyme A binding domain containing 6, binds long chain acyl-CoAs with a preference for unsaturated, C18:1 CoA and C20:4 CoA, a cellular marker for primitive progenitor cells that function in hematopoiesis and vascular endothelium development |
| 52          | Human Druggable | ACP1        | 1.98                 | 2.68    | Acid phosphatase 1 soluble, a tyrosine phosphatase that acts in receptor-mediated signaling                                                                                                                                                              |
| 51205       | Human Druggable | ACP6        | 1.85                 | 2.02    | Acid phosphatase 6 lysophosphatidic, hydrolyzes lysophosphatidic acid to monoacylglycerol, may play a role in the mitochondrial lipid biosynthesis, gastrointestinal motor function, and in the pacemaker activity of interstitial cells                 |
| 148         | GPCR            | ADRA1A      | 1.86                 | 1.96    | Adrenergic alpha-1A- receptor, a G protein-coupled receptor that functions in cytosolic calcium elevation, phospholipase C activation, apoptosis, cell-cell signaling, smooth muscle and heart contraction                                               |
| 9447        | Human Druggable | AIM2        | 2.39                 | 3.17    | Absent in melanoma 2, regulates cytoplasmic DNA-induced caspase-1 activation and IL1 beta processing and inhibits cell proliferation                                                                                                                     |
| 9863        | Human Druggable | AIP1        | 1.88                 | 2.04    | Activin receptor interacting protein 1, binds to PTEN, plays a role in signal transduction                                                                                                                                                               |
| 10840       | ROHG            | ALDH1L1     | 1.91                 | 1.91    | Aldehyde dehydrogenase 1 family member L1, an oxidoreductase that acts in 10-formyltetrahydrofolate catabolism and negative regulation of cell growth and proliferation                                                                                  |
| 310         | Human Druggable | ANXA7       | 2.27                 | 2.96    | Annexin A7, an voltage-dependent calcium channel, involved in vesicle fusion and cellular response to glucose starvation, regulates calcium-mediated signaling and cell proliferation                                                                    |

| Entrez Gene | Library         | Gene Symbol | Fold $\Delta$ ApoA-I | Z-Score | Gene Summary                                                                                                                                                                                            |
|-------------|-----------------|-------------|----------------------|---------|---------------------------------------------------------------------------------------------------------------------------------------------------------------------------------------------------------|
| 160         | ROHG            | AP2A1       | 1.98                 | 2.41    | Adaptor-related protein complex 2 alpha 1 subunit, a transporter that acts in receptor-mediated endocytosis, may play a role in membrane budding                                                        |
| 115201      | ROHG            | APG4A       | 2.26                 | 2.49    | ATG4 autophagy related 4 homolog A, a cysteine endopeptidase that has specificity for ubiquitin-like proteins, may act in intra-Golgi transport by cleaving the intra-Golgi transport modulator GATE-16 |
| 335         | Human Druggable | APOA1       | 0.14                 | -2.01   | Apolipoprotein A-I, a cholesterol transporter that acts in cAMP biosynthesis                                                                                                                            |
| 390         | Human Druggable | ARHE        | 1.83                 | 1.94    | Rho family GTPase 3, a translation repressor that inhibits mitotic cell cycle, stress fiber assembly, cap-dependent translation, and cell proliferation, mediates cell migration and transcription      |
| 57584       | ROHG            | ARHGAP21    | 1.90                 | 2.10    | Rho GTPase activating protein 21, binds to protein kinase, acts in the regulation of cell migration, GTPase activity, and protein amino acid phosphorylation                                            |
| 64333       | ROHG            | ARHGAP9     | 0.13                 | -2.04   | Rho GTPase activating protein 9, selective for RAC1 and CDC42, binds phosphoinositide ligands through a spectrin-like binding pocket, negatively regulates cell adhesion to fibronectin                 |
| 84100       | ROHG            | ARL6        | 2.01                 | 1.99    | ADP-ribosylation factor-like 6, a GTP binding protein that may function in membrane-associated intracellular trafficking, ciliary disassembly and Wnt signaling                                         |
| 79754       | ROHG            | ASB13       | 2.17                 | 2.74    | Protein has moderate similarity to human ASB9, which inhibits mitochondrial function and cell growth, promotes protein ubiquitination, contains six ankyrin repeats                                     |
| 429         | Human Druggable | ASCL1       | 2.03                 | 2.34    | Achaete-scute complex homolog 1, a transcriptional activator                                                                                                                                            |
| 79058       | Human Druggable | ASPSCR1     | 1.89                 | 2.08    | Alveolar soft part sarcoma chromosome region candidate 1                                                                                                                                                |

| Entrez Gene | Library         | Gene Symbol | Fold $\Delta$ ApoA-I | Z-Score | Gene Summary                                                                                                                                                                                                              |
|-------------|-----------------|-------------|----------------------|---------|---------------------------------------------------------------------------------------------------------------------------------------------------------------------------------------------------------------------------|
| 471         | Human Druggable | ATIC        | 1.97                 | 2.31    | 5-aminoimidazole-4-carboxamide ribonucleotide formyltransferase, an IMP cyclohydrolase that acts in de novo IMP biosynthesis                                                                                              |
| 487         | Human Druggable | ATP2A1      | 0.23                 | -2.09   | ATPase Ca <sup>++</sup> transporting cardiac muscle fast twitch 1, plays a role in calcium ion transport, regulates action potential, heart contraction, and striated muscle contraction                                  |
| 10538       | Human Druggable | BATF        | 2.04                 | 2.36    | Basic leucine zipper transcription factor ATF-like, an RNA polymerase II transcription factor, heterodimerizes with Jun proteins and IFI35, inhibits AP-1 mediated transcription and Ras-mediated transformation          |
| 8424        | ROHG            | BBOX1       | 2.14                 | 2.40    | Gamma-butyrobetaine dioxygenase, a putative enzyme that binds ferrous ion, may play a role in carnitine biosynthesis                                                                                                      |
| 607         | Human Druggable | BCL9        | 2.28                 | 2.97    | B-cell CLL-lymphoma 9, a transcriptional activator that regulates Wnt receptor signaling, cell proliferation, epithelial to mesenchymal transition, and angiogenesis                                                      |
| 113452      | ROHG            | BCLP        | 1.98                 | 1.94    | Beta-casein-like protein, a tumor associated antigen that may regulate tumor cell morphology and growth pattern                                                                                                           |
| 53630       | ROHG            | BCMO1       | 2.02                 | 2.34    | Beta-carotene 15-15'-monooxygenase 1, mediates retinal metabolism                                                                                                                                                         |
| 10565       | Human Druggable | BIG1        | 0.21                 | -2.16   | ADP-ribosylation factor guanine nucleotide-exchange factor 1, binds to myosin and microtubule, maintains normal Golgi morphology and inhibits Rho GTPase activity, mediates endomembrane organization and N-glycosylation |
| 274         | Human Druggable | BIN1        | 1.96                 | 2.24    | Bridging integrator 1, involved in microtubule bundle formation, sarcomere organization, and myofiber development                                                                                                         |
| 666         | Human Druggable | BOK         | 1.84                 | 1.95    | BCL2-related ovarian killer, interacts with BNIP3, induces apoptosis in response to DNA damage via TP53 signal transduction pathway,                                                                                      |

| Entrez Gene | Library         | Gene Symbol | Fold $\Delta$ ApoA-I | Z-Score | Gene Summary                                                                                                                                                                                                                  |
|-------------|-----------------|-------------|----------------------|---------|-------------------------------------------------------------------------------------------------------------------------------------------------------------------------------------------------------------------------------|
| 686         | Human Druggable | BTD         | 1.98                 | 2.29    | Biotinidase, catalyzes the hydrolysis of biocytin to release free biotin, may play a role in central nervous system and epidermis development                                                                                 |
| 219771      | Human Druggable | C10ORF9     | 2.32                 | 3.07    | Cyclin Y, regulates cell proliferation, colony formation, and cell cycle progression in glioma cells                                                                                                                          |
| 79622       | ROHG            | C16ORF33    | 0.16                 | -2.00   | Chromosome 16 open reading frame 33 (U11/U12 snRNP 25K protein), a component of the 18S U11/U12 snRNP that binds C6orf151 and U11 snRNA and plays a role in RNA splicing                                                      |
| 8131        | ROHG            | C16ORF35    | 2.10                 | 2.30    | Protein with very strong similarity to uncharacterized mouse Mare                                                                                                                                                             |
| 58509       | ROHG            | C19ORF29    | 0.16                 | -1.97   | NY-REN-24 antigen, a renal cell carcinoma tumor antigen that is recognized by an autoantibody                                                                                                                                 |
| 10616       | Human Druggable | C20ORF18    | 0.30                 | -1.90   | RanBP-type and C3HC4-type zinc finger containing 1, a transcription regulator that plays a role in cytoplasmic sequestering of protein, protein ubiquitination, and proteasomal ubiquitin-dependent protein catabolic process |
| 164312      | ROHG            | C20ORF75    | 2.02                 | 2.43    | Protein with high similarity to neuronal leucine rich repeat-4, which plays a key role in hippocampal-dependent long lasting memory, contains 6 leucine rich repeats and a fibronectin type III domain                        |
| 200558      | ROHG            | C2ORF13     | 1.94                 | 2.23    | Aprataxin and PNKP like factor, an endo- and exonuclease that interacts with the DNA repair proteins, involved in the cellular response to chromosomal DNA strand breaks, activates ADP-ribosyltransferase                    |
| 83648       | ROHG            | C8ORF13     | 0.20                 | -1.91   | Family with sequence similarity 167 member A                                                                                                                                                                                  |
| 786         | ROHG            | CACNG1      | 2.08                 | 2.66    | Calcium channel (voltage-dependent, gamma subunit 1), probably involved in calcium ion transport and coupling of excitation and contraction in muscle                                                                         |

| Entrez Gene | Library         | Gene Symbol | Fold $\Delta$ ApoA-I | Z-Score | Gene Summary                                                                                                                                                                                 |
|-------------|-----------------|-------------|----------------------|---------|----------------------------------------------------------------------------------------------------------------------------------------------------------------------------------------------|
| 790         | ROHG            | CAD         | 2.33                 | 3.27    | CAD trifunctional protein, a carbamoyl-phosphate synthase that plays a role in de novo pyrimidine base biosynthesis, MAPKKK cascade, and cell proliferation                                  |
| 152137      | ROHG            | CCDC50      | 1.98                 | 1.94    | Coiled-coil domain containing 50, suppresses ligand-mediated down regulation of the EGF receptor, binds several proteins to negatively regulate NF-kappaB signaling                          |
| 6361        | GPCR            | CCL17       | 0.14                 | -1.95   | Chemokine ligand 17, interacts with CCR4, acts in chemotaxis, cell-cell signaling, and platelet activation                                                                                   |
| 896         | Human Druggable | CCND3       | 1.88                 | 2.00    | Cyclin D3, a cyclin-dependent protein kinase regulator that modulates cell cycle, cell proliferation, and apoptosis, acts in Notch signaling, hemopoiesis, and skeletal muscle development   |
| 10983       | Human Druggable | CCNI        | 1.95                 | 2.16    | Cyclin I, a putative cyclin dependent protein kinase regulator that may play a role in spermatogenesis                                                                                       |
| 9973        | Human Druggable | CCS         | 0.28                 | -1.98   | Copper chaperone for superoxide dismutase, a copper ion transmembrane transporter that plays a role in superoxide metabolism and regulation of gene expression                               |
| 50489       | ROHG            | CD207       | 1.98                 | 2.23    | CD207 molecule langerin, a receptor that plays a role in endocytosis, antigen processing and presentation, regulates natural killer T cell activation and IL-12 production                   |
| 961         | Human Druggable | CD47        | 1.96                 | 2.18    | CD47 molecule, an Rac GTPase activator and a receptor signaling protein that acts in cell adhesion, induction of apoptosis, and cell migration                                               |
| 963         | Human Druggable | CD53        | 1.85                 | 1.95    | CD53 molecule, binds CD81 and CD82, involved in JNK activation, homophilic cell adhesion, and calcium ion transport, induces DNA synthesis, B-cell proliferation, and IgG and IgM production |

| Entrez Gene | Library         | Gene Symbol | Fold $\Delta$ ApoA-I | Z-Score | Gene Summary                                                                                                                                                                                                            |
|-------------|-----------------|-------------|----------------------|---------|-------------------------------------------------------------------------------------------------------------------------------------------------------------------------------------------------------------------------|
| 972         | Human Druggable | CD74        | 1.72                 | 1.95    | CD74 antigen, regulates antigen processing and presentation, T-cell immunity, B cell proliferation and differentiation, and MAPK and I-kappaB kinase/NF-kappaB cascades                                                 |
| 976         | GPCR            | CD97        | 1.97                 | 2.21    | CD97 molecule, a chemoattractant receptor that promotes chemotaxis, angiogenesis, T-cell proliferation, and cytokine production, acts in integrin-mediated signaling                                                    |
| 113130      | ROHG            | CDCA5       | 2.17                 | 2.32    | Cell division cycle associated 5, required for proper cohesion binding to chromatin during G2 phase, and efficient repair of DNA double strand breaks in G2                                                             |
| 10423       | ROHG            | CDIPT       | 2.17                 | 2.46    | CDP diacylglycerol inositol 3 phosphatidyltransferase, a phosphatidylinositol transporter that plays a role in phosphatidylinositol biosynthesis and cell proliferation                                                 |
| 634         | ROHG            | CEACAM1     | 1.78                 | 1.92    | Carcinoembryonic antigen-related cell adhesion molecule 1, binds to receptors, acts in activation of protein kinase B activity, cell proliferation, and lymphangiogenesis                                               |
| 1053        | Human Druggable | CEBPE       | 2.15                 | 2.62    | CCAAT enhancer binding protein epsilon, a transcription regulator, regulates cell proliferation                                                                                                                         |
| 1054        | Human Druggable | CEBPG       | 2.30                 | 2.96    | CCAAT enhancer binding protein gamma, a transcription repressor that plays a role in DNA dependent regulation of transcription                                                                                          |
| 1062        | Human Druggable | CENPE       | 0.30                 | -1.92   | Centromere protein E 312kDa, a kinesin-like motor protein that acts in mitotic cell cycle checkpoint, metaphase plate congression, and kinetochore-microtubule attachment, acts as an autoantigen in systemic sclerosis |
| 1063        | Human Druggable | CENPF       | 1.98                 | 2.24    | Centromere protein F 350-400ka, a transcription corepressor that acts in mitosis, cytokinesis, and apoptosis                                                                                                            |
| 9023        | ROHG            | CH25H       | 2.20                 | 2.52    | Cholesterol 25-hydroxylase, plays a role in lipid and cholesterol metabolism, inhibits cell proliferation                                                                                                               |

| Entrez Gene | Library              | Gene Symbol | Fold $\Delta$ ApoA-I | Z-Score | Gene Summary                                                                                                                                                                                                                                  |
|-------------|----------------------|-------------|----------------------|---------|-----------------------------------------------------------------------------------------------------------------------------------------------------------------------------------------------------------------------------------------------|
| 1122        | Human Druggable      | CHML        | 0.11                 | -2.44   | Choroideremia-like Rab escort protein 2, a Rab GTPase binding protein that plays a role in protein geranylgeranylation                                                                                                                        |
| 1133        | Human Druggable      | CHRM5       | 0.29                 | -1.94   | Cholinergic receptor muscarinic 5, a G protein-coupled receptor that acts through stimulation of phospholipase C and elevation of intracellular calcium                                                                                       |
| 1280        | Human Druggable      | COL2A1      | 1.84                 | 1.93    | Collagen type II alpha 1, binds to integrin, acts in skeletal system development, transforming growth factor beta receptor signaling pathway, and collagen fibril organization                                                                |
| 1288        | Human Druggable      | COL4A6      | 2.10                 | 2.56    | Collagen type IV alpha 6, inhibits angiogenesis and endothelial cell proliferation                                                                                                                                                            |
| 9276        | Human Protein Kinase | COPB2       | 0.12                 | -1.97   | Coatmer protein complex subunit beta 2, may play a role in exocytosis                                                                                                                                                                         |
| 10229       | ROHG                 | COQ7        | 2.03                 | 2.17    | Coenzyme Q7 homolog ubiquinone, a putative oxidoreductase that plays a role in ubiquinone and quinone cofactor biosynthesis, mitochondrial organization and function, neuron generation, and embryonic development, regulates gluconeogenesis |
| 51692       | ROHG                 | CPSF3       | 1.94                 | 2.15    | Cleavage and polyadenylation specificity factor 3, a transcription repressor that acts in mRNA polyadenylation                                                                                                                                |
| 1392        | Human Druggable      | CRH         | 2.47                 | 3.43    | Corticotropin releasing hormone, a nitric-oxide synthase regulator that is involved in steroidogenesis, synaptic transmission, and immune response                                                                                            |
| 49860       | ROHG                 | CRNN        | 1.93                 | 2.12    | Cornulin, a calcium binding protein that acts in cell cycle arrest and inhibits cell proliferation                                                                                                                                            |
| 1473        | ROHG                 | CST5        | 2.42                 | 3.49    | Cystatin D, a cysteine protease inhibitor                                                                                                                                                                                                     |
| 1485        | ROHG                 | CTAG1B      | 1.88                 | 2.17    | Cancer testis antigen 1, acts in humoral immune response and cellular defense response                                                                                                                                                        |



| Entrez Gene | Library         | Gene Symbol | Fold $\Delta$ ApoA-I | Z-Score | Gene Summary                                                                                                                                                                                  |
|-------------|-----------------|-------------|----------------------|---------|-----------------------------------------------------------------------------------------------------------------------------------------------------------------------------------------------|
| 10217       | ROHG            | CTDSPL      | 2.04                 | 2.18    | Carboxy terminal domain RNA polymerase II polypeptide A small phosphatase like, a putative phosphoprotein phosphatase that inhibits cell proliferation                                        |
| 1499        | Human Druggable | CTNNB1      | 1.82                 | 1.92    | Catenin beta 1, a transcriptional activator that plays a role in antiapoptosis and cell differentiation, regulates G2-M transition of mitotic cell cycle and positive selection of thymocytes |
| 1497        | Human Druggable | CTNS        | 1.86                 | 2.01    | Cystinosis nephropathic, a lysosomal L-cystine transmembrane transporter that acts in lysosomal cystine transport                                                                             |
| 1509        | Human Druggable | CTSD        | 1.88                 | 2.02    | Cathepsin D, a peptidase that acts in angiogenesis and apoptosis                                                                                                                              |
| 1512        | Human Druggable | CTSH        | 2.89                 | 4.32    | Cathepsin H, involved in response to low density lipoprotein stimulus                                                                                                                         |
| 1513        | Human Druggable | CTSK        | 2.75                 | 4.00    | Cathepsin K, a collagenolytic cysteine protease that acts in ossification, increased expression causes arteriosclerosis                                                                       |
| 1520        | Human Druggable | CTSS        | 2.55                 | 3.55    | Cathepsin S, a cysteine-type peptidase that regulates angiogenesis and microglial cell migration, acts in antigen processing and presentation                                                 |
| 58191       | ROHG            | CXCL16      | 1.92                 | 2.15    | Chemokine (C-X-C motif) ligand 16, a scavenger receptor that regulates oxidized LDL uptake, acts in angiogenesis and cell migration, upregulated in myocardial infarction and pancreatitis    |
| 220002      | ROHG            | CYBASC3     | 1.93                 | 2.22    | Protein with high similarity to mouse Cybrd1, which is a b-type cytochrome with ferric reductase activity that acts in the iron absorption pathway                                            |
| 79901       | ROHG            | CYBRD1      | 2.04                 | 2.44    | Cytochrome b reductase 1, involved in iron homeostasis, reduces monodehydroascorbate to ascorbate                                                                                             |
| 1583        | Human Druggable | CYP11A1     | 1.93                 | 2.11    | Cytochrome P450 family 11 subfamily A polypeptide 1, cholesterol monooxygenase that acts in steroid biosynthesis and osteoblast proliferation                                                 |

| Entrez Gene | Library         | Gene Symbol  | Fold $\Delta$ ApoA-I | Z-Score | Gene Summary                                                                                                                                                                                      |
|-------------|-----------------|--------------|----------------------|---------|---------------------------------------------------------------------------------------------------------------------------------------------------------------------------------------------------|
| 1562        | Human Druggable | CYP2C18      | 1.84                 | 1.91    | Cytochrome P450 family 2 subfamily C polypeptide 18, a monooxygenase and retinoic acid 4-hydroxylase that plays a role in retinoid and xenobiotic metabolic process                               |
| 10858       | ROHG            | CYP46A1      | 1.96                 | 2.01    | Cytochrome P450 family 46 subfamily A polypeptide 1, catalyzes the conversion of cholesterol to 24S-hydroxycholesterol, may play a role in beta-amyloid metabolism and nervous system development |
| 23002       | Human Druggable | DAAM1        | 1.90                 | 2.06    | Dishevelled associated activator of morphogenesis 1, binds to Rho GTPase RHOA, RHOB, and RHOC, plays a role in actin assembly and Wnt receptor signaling                                          |
| 1621        | Human Druggable | DBH          | 2.22                 | 2.78    | Dopamine beta-hydroxylase, catalyzes dopamine to norepinephrine conversion, acts in locomotory behavior and sensory perception                                                                    |
| 28983       | Human Druggable | DESC1        | 1.93                 | 2.11    | Transmembrane protease serine 11E, hydrolyzes extracellular matrix components, including fibronectin, gelatin and fibrinogen, confers tumorigenic properties to Madin Darby canine kidney cells   |
| 1687        | Human Druggable | DFNA5        | 2.12                 | 2.55    | Deafness autosomal dominant 5, may play a role in caspase activation, cell proliferation, and cell cycle arrest                                                                                   |
| 54487       | ROHG            | DGCR8        | 2.23                 | 2.82    | DiGeorge syndrome critical region gene 8, binds to RNA and mediates stem cell division, pre-microRNA and primary microRNA processing                                                              |
| 9249        | ROHG            | DHRS3        | 1.98                 | 2.05    | Dehydrogenase reductase SDR family member 3, catalyzes the NADPH-dependent reduction of all-trans-retinal, plays a role in fatty acid metabolism                                                  |
| 22907       | ROHG            | DHX30        | 2.05                 | 2.39    | DEAH box polypeptide 30, a corepressor of photoreceptor cell-specific nuclear receptor (NR2E3)                                                                                                    |
| 26130       | ROHG            | DKFZP434C212 | 1.94                 | 2.14    | GTPase activating protein and VPS9 domains 1, a Rab guanyl-nucleotide exchange factor and Ras GTPase activator, plays a role in endocytosis                                                       |

| Entrez Gene | Library         | Gene Symbol   | Fold $\Delta$ ApoA-I | Z-Score | Gene Summary                                                                                                                                                                                                            |
|-------------|-----------------|---------------|----------------------|---------|-------------------------------------------------------------------------------------------------------------------------------------------------------------------------------------------------------------------------|
| 64753       | ROHG            | DKFZP434G156  | 2.29                 | 3.03    | Protein of unknown function                                                                                                                                                                                             |
| 81556       | ROHG            | DKFZP564O1664 | 0.27                 | -1.92   | Chromosome 15 open reading frame 44                                                                                                                                                                                     |
| 84067       | ROHG            | DKFZP566M1046 | 2.22                 | 2.41    | Protein of unknown function, has strong similarity to uncharacterized rat MGC94288                                                                                                                                      |
| 10294       | Human Druggable | DNAJA2        | 1.98                 | 2.24    | DnaJ (Hsp40) homolog subfamily A member 2, a HSC70 protein regulator that plays a role in protein folding and refolding, functions in mitochondrial translocation                                                       |
| 1778        | Human Druggable | DNCH1         | 0.26                 | -2.02   | Dynein cytoplasmic 1 heavy chain 1, catalyzes the movement along a microtubule, plays a role in the mitotic spindle organization and biogenesis and retrograde axon cargo transport;                                    |
| 1786        | Human Druggable | DNMT1         | 2.12                 | 2.55    | DNA (cytosine-5-)-methyltransferase, binds to DNMT3A and DNMT3B, acts in DNA methylation and gene silencing, interacts with HDAC2 and DMAP1 to mediate transcriptional repression                                       |
| 116092      | Human Druggable | DNTTIP1       | 1.93                 | 2.12    | Deoxynucleotidyltransferase terminal interacting protein 1, a single-stranded DNA binding protein that interacts with and regulates the activity of DNNT                                                                |
| 220164      | ROHG            | DOK5L         | 1.87                 | 2.06    | Docking protein 6, a RET substrate, promotes neurite outgrowth mediated by RET, member of the p62Dok family, contains a PH domain and a PTB domain                                                                      |
| 57171       | Human Druggable | DOLPP1        | 0.29                 | -1.94   | Protein with strong similarity to mouse Dolpp1, which plays a role in lipid metabolic process and protein amino acid N-linked glycosylation, member of the phosphatidic acid phosphatase-related phosphoesterase family |
| 57628       | ROHG            | DPP10         | 2.01                 | 2.37    | Dipeptidylpeptidase 10, a potassium channel regulator that plays a role in intracellular protein transport                                                                                                              |

| Entrez Gene | Library              | Gene Symbol | Fold $\Delta$ ApoA-I | Z-Score | Gene Summary                                                                                                                                                                         |
|-------------|----------------------|-------------|----------------------|---------|--------------------------------------------------------------------------------------------------------------------------------------------------------------------------------------|
| 56896       | ROHG                 | DPYSL5      | 1.97                 | 2.29    | Dihydropyrimidinase like 5, binds to kinases, may play a role in axon guidance, nervous system development, and signal transduction                                                  |
| 4733        | Human Druggable      | DRG1        | 1.84                 | 1.92    | Developmentally regulated GTP binding protein 1, binds to TAL1 and inhibits prostate cancer metastasis                                                                               |
| 8624        | ROHG                 | DSCR2       | 1.95                 | 1.99    | Proteasome assembly chaperone 1, exhibits protein heterodimerization activity, plays a role in proteasome assembly                                                                   |
| 51207       | Human Druggable      | DUSP13      | 1.96                 | 2.62    | Dual specificity phosphatase 13, a protein tyrosine-serine-threonine phosphatase that may inhibit MAPKKK cascade                                                                     |
| 1846        | Human Protein Kinase | DUSP4       | 1.95                 | 2.12    | Dual specificity phosphatase 4, plays a role in cell aging, induction of apoptosis by oxidative stress, and inactivation of MAPK, regulates apoptosis                                |
| 84651       | ROHG                 | ECG2        | 2.06                 | 2.09    | Serine peptidase inhibitor Kazal type 7, binds to p53, mediates mitotic spindle checkpoint, apoptosis induction, and protein localization, inhibits ubiquitination                   |
| 1842        | Human Druggable      | ECM2        | 1.88                 | 2.02    | Extracellular matrix protein 2 female organ and adipocyte specific, may play a role in cell-matrix adhesion                                                                          |
| 8661        | Human Druggable      | EIF3S10     | 0.09                 | -2.07   | Eukaryotic translation initiation factor 3 subunit A, a putative translation initiation factor that inhibits epithelial cell differentiation                                         |
| 8668        | Human Druggable      | EIF3S2      | 0.16                 | -1.93   | Eukaryotic translation initiation factor-3 subunit-I, a transcription corepressor that acts in regulation of TGF-beta receptor signaling pathway, cell cycle, and cell proliferation |
| 8663        | Human Druggable      | EIF3S8      | 0.17                 | -1.90   | Eukaryotic translation initiation factor 3 subunit C, a cytosolic small ribosomal subunit that binds and recruits EIF1 to 40S ribosomes, negatively regulates cell proliferation     |

| Entrez Gene | Library         | Gene Symbol | Fold $\Delta$ ApoA-I | Z-Score | Gene Summary                                                                                                                                                                                         |
|-------------|-----------------|-------------|----------------------|---------|------------------------------------------------------------------------------------------------------------------------------------------------------------------------------------------------------|
| 2013        | ROHG            | EMP2        | 1.99                 | 2.45    | Epithelial membrane protein 2, acts in regulation of gene expression, induction of apoptosis, embryo implantation, cell-matrix adhesion, endosome to lysosome transport, and macroautophagy          |
| 94240       | ROHG            | EPSTI1      | 2.03                 | 2.04    | Epithelial stromal interaction 1, plays a role in regulation of breast tumor cell properties and epithelial-mesenchymal transition                                                                   |
| 345062      | ROHG            | ESSPL       | 1.97                 | 2.56    | Protein of unknown function, has moderate similarity to protease serine 21                                                                                                                           |
| 2107        | Human Druggable | ETF1        | 0.18                 | -1.90   | Eukaryotic translation termination factor 1, binds to translation release factors, plays a role in selenocysteine incorporation                                                                      |
| 23474       | ROHG            | ETHE1       | 2.48                 | 3.36    | Ethylmalonic encephalopathy 1, a transcriptional suppressor that interacts with histone deacetylase acts in antiapoptosis, TP53 ubiquitylation and degradation                                       |
| 2113        | Human Druggable | ETS1        | 1.99                 | 2.27    | Homolog 1 of v-ets erythroblastosis virus E26 oncogene, a transcription activator that acts in apoptosis, blood vessel remodeling, decidualization, and regulation of cytokine secretion             |
| 2117        | Human Druggable | ETV3        | 1.90                 | 2.07    | Ets variant gene 3, a putative transcriptional repressor that may play a role in cell proliferation, macrophage differentiation, and multicellular organismal development                            |
| 2149        | GPCR            | F2R         | 1.87                 | 1.94    | Coagulation factor II thrombin receptor, a RAP GTPase activator that acts in inflammatory response, blood coagulation, platelet activation, and degranulation, regulates vasodilation and cell cycle |
| 84548       | ROHG            | FAM11A      | 2.30                 | 2.56    | Protein of unknown function, has strong similarity to uncharacterized mouse Tmem185b                                                                                                                 |
| 10144       | ROHG            | FAM13A1     | 1.96                 | 2.01    | Family with sequence similarity 13 member A, a predicted Rho GTPase activator acting in Rho signal transduction                                                                                      |
| 51063       | ROHG            | FAM26B      | 1.99                 | 2.26    | Protein of unknown function, has strong similarity to uncharacterized mouse Calhm2                                                                                                                   |

| Entrez Gene | Library              | Gene Symbol | Fold $\Delta$ ApoA-I | Z-Score | Gene Summary                                                                                                                                                                                                                                     |
|-------------|----------------------|-------------|----------------------|---------|--------------------------------------------------------------------------------------------------------------------------------------------------------------------------------------------------------------------------------------------------|
| 23014       | Human Druggable      | FBXO21      | 2.12                 | 2.55    | Protein containing an F-box domain, which serves as a link between a target protein and a ubiquitin-conjugating enzyme                                                                                                                           |
| 56929       | ROHG                 | FEM1C       | 1.99                 | 2.33    | Fem-1 homolog c, a putative transcription regulator that may play a role in skeletal system development, signal transduction, and sex determination                                                                                              |
| 152273      | ROHG                 | FGD5        | 2.65                 | 3.26    | Protein containing two pleckstrin homology (PH) domains, which mediate protein-protein interactions, a RhoGEF (GTPase exchange factor) domain, and a FYVE zinc finger domain, has a region of low similarity to rat Fgd4, which crosslinks actin |
| 2260        | Human Protein Kinase | FGFR1       | 1.96                 | 2.16    | Fibroblast growth factor receptor 1, a putative protein tyrosine kinase that acts in cell proliferation and skeletal development                                                                                                                 |
| 2288        | Human Druggable      | FKBP4       | 1.89                 | 2.03    | FK506 binding protein 4 59kDa, a cochaperone immunophilin that exhibits peptidyl-prolyl cis-trans isomerase activity, functions in copper ion transport and protein refolding                                                                    |
| 55113       | ROHG                 | FLJ10307    | 2.05                 | 2.41    | Protein with weak similarity to <i>C. elegans</i> CED-8, which is a plasma membrane protein that appears to have a role in the modulation of the kinetics of cell corpse engulfment during development                                           |
| 55226       | ROHG                 | FLJ10774    | 2.08                 | 2.48    | N-acetyltransferase 10, a DNA binding transcription activator that mediates histone acetylation and mitotic chromosome decondensation                                                                                                            |
| 79643       | ROHG                 | FLJ11749    | 0.18                 | -1.96   | Chromatin modifying protein 6, plays a role in endosome transport, may mediate cholesterol transport                                                                                                                                             |
| 64943       | ROHG                 | FLJ12442    | 2.13                 | 2.65    | Protein with moderate similarity to Rice Os09g0424600, which is involved in response to anoxia                                                                                                                                                   |
| 65251       | ROHG                 | FLJ12644    | 1.82                 | 1.92    | Zinc finger protein 649, a nuclear transcriptional repressor that inhibits transcriptional activities of SRE and AP1                                                                                                                             |

| Entrez Gene | Library         | Gene Symbol | Fold $\Delta$ ApoA-I | Z-Score | Gene Summary                                                                                                                                                                                                                                    |
|-------------|-----------------|-------------|----------------------|---------|-------------------------------------------------------------------------------------------------------------------------------------------------------------------------------------------------------------------------------------------------|
| 79815       | ROHG            | FLJ13955    | 2.07                 | 2.51    | Member of the DUF803 domain of unknown function family, has strong similarity to uncharacterized mouse Npal2                                                                                                                                    |
| 79903       | ROHG            | FLJ14154    | 0.18                 | -1.92   | Member of the acetyltransferase (GNAT) family                                                                                                                                                                                                   |
| 54463       | ROHG            | FLJ20152    | 2.12                 | 2.57    | Family with sequence similarity 134 member B, localized to the cis-Golgi                                                                                                                                                                        |
| 54471       | ROHG            | FLJ20232    | 1.85                 | 1.94    | Protein of unknown function, has very strong similarity to uncharacterized mouse AI452372                                                                                                                                                       |
| 60526       | ROHG            | FLJ21820    | 2.00                 | 2.35    | Protein of unknown function, has high similarity to uncharacterized mouse 1110057K04Rik                                                                                                                                                         |
| 64772       | Human Druggable | FLJ21865    | 2.00                 | 2.28    | Endo beta N acetylglucosaminidase, catabolizes free oligosaccharides in the cytosol                                                                                                                                                             |
| 80233       | ROHG            | FLJ22175    | 0.17                 | -1.95   | Protein of unknown function, has high similarity to uncharacterized mouse 2310003H01Rik                                                                                                                                                         |
| 79733       | ROHG            | FLJ23311    | 2.09                 | 2.57    | E2F transcription factor 8, a transcriptional repressor that inhibits cell proliferation, may repress expression of E2F-target genes in the S-phase of the cell cycle                                                                           |
| 132332      | ROHG            | FLJ30834    | 2.33                 | 2.62    | Protein of unknown function                                                                                                                                                                                                                     |
| 144577      | ROHG            | FLJ32549    | 2.25                 | 2.47    | Protein of unknown function, has strong similarity to uncharacterized mouse BC048403                                                                                                                                                            |
| 255252      | ROHG            | FLJ36812    | 1.89                 | 2.11    | Protein containing four leucine rich repeats, which mediate protein-protein interactions, has low similarity to a region of suppressor of clear (soc-2) homolog, which forms a complex with Ras and Raf and has a role in ERK (MAPK1) signaling |
| 283284      | ROHG            | FLJ37794    | 0.14                 | -2.05   | Protein containing two fibronectin type III, three immunoglobulin (Ig), four immunoglobulin V-set, and six immunoglobulin I-set domain                                                                                                          |

| Entrez Gene | Library              | Gene Symbol | Fold $\Delta$ ApoA-I | Z-Score | Gene Summary                                                                                                                                                                                                                |
|-------------|----------------------|-------------|----------------------|---------|-----------------------------------------------------------------------------------------------------------------------------------------------------------------------------------------------------------------------------|
| 284309      | ROHG                 | FLJ38288    | 2.04                 | 2.48    | Protein with high similarity to human ZNF418, which is a transcriptional repressor that inhibits MAPKKK cascade, member of the KRAB box family, contains nine zinc finger C2H2 type repeats                                 |
| 126272      | ROHG                 | FLJ38944    | 2.09                 | 2.15    | EID-2-like inhibitor of differentiation-3, a member of the EID family which negatively regulates transcription by preventing the recruitment of the co-activator complex, CBP-p300, to nuclear receptor regulated promoters |
| 124989      | ROHG                 | FLJ40342    | 2.45                 | 2.86    | Protein of unknown function                                                                                                                                                                                                 |
| 222194      | ROHG                 | FLJ42526    | 1.93                 | 2.22    | Protein with high similarity to mouse Rsb1, which binds to protein kinase A                                                                                                                                                 |
| 2316        | Human Druggable      | FLNA        | 1.86                 | 2.00    | Filamin A alpha, acts in actin cytoskeleton organization and apoptosis, regulates cell migration                                                                                                                            |
| 2321        | Human Protein Kinase | FLT1        | 1.98                 | 2.19    | Fms-related tyrosine kinase 1, a vascular endothelial growth factor receptor, acts in angiogenesis, ossification, response to hypoxia, cell phosphorylation, and proliferation                                              |
| 2339        | Human Druggable      | FNTA        | 2.02                 | 2.33    | Farnesyltransferase CAAX box alpha, a geranylgeranyltransferase that mediates insulin receptor and transforming growth factor beta receptor signaling, regulates Ras protein signal transduction                            |
| 3170        | Human Druggable      | FOXA2       | 2.45                 | 3.31    | Forkhead box A2, a transcriptional regulator that mediates glucose metabolism, cell cycle, apoptosis, cell proliferation and differentiation, and tissue and organ development                                              |
| 84824       | Human Druggable      | FREB        | 1.85                 | 1.97    | Fc receptor-like A, a putative immunoglobulin receptor that may play a role in B cell differentiation                                                                                                                       |
| 2529        | ROHG                 | FUT7        | 2.26                 | 3.10    | Fucosyltransferase 7 (alpha (1,3) fucosyltransferase), forms the sialyl Lewis x moiety and functions in the glycosylation of selectin ligands                                                                               |



| Entrez Gene | Library         | Gene Symbol | Fold $\Delta$ ApoA-I | Z-Score | Gene Summary                                                                                                                                                                                               |
|-------------|-----------------|-------------|----------------------|---------|------------------------------------------------------------------------------------------------------------------------------------------------------------------------------------------------------------|
| 2531        | Human Druggable | FVT1        | 1.89                 | 2.04    | 3-ketodihydrosphingosine reductase, a 3-ketodihydrosphingosine reductase that catalyzes reduction of 3-ketodihydrosphingosine to dihydrosphingosine                                                        |
| 53827       | ROHG            | FXYD5       | 1.97                 | 2.22    | FXD domain-containing ion transport regulator 5, a member of the FXD-domain family of small ion transport regulators or channels, inactivates cadherin-mediated cell-cell adhesion and promotes metastasis |
| 50486       | ROHG            | G0S2        | 1.91                 | 2.07    | G0-G1switch 2, involved in response to retinoic acid                                                                                                                                                       |
| 55879       | Human Druggable | GABRQ       | 2.33                 | 3.09    | Gamma-aminobutyric acid (GABA) receptor subunit theta, a GABA-A receptor that plays a role in synaptic transmission                                                                                        |
| 2581        | Human Druggable | GALC        | 2.41                 | 3.22    | Galactosylceramidase, may play a role in galactosylceramide catabolism                                                                                                                                     |
| 130589      | ROHG            | GALM        | 1.97                 | 1.92    | Galactose mutarotase (aldose 1-epimerase), an enzyme that catalyzes the conversion of glucose and galactose between alpha and beta anomers,                                                                |
| 8693        | ROHG            | GALNT4      | 1.94                 | 1.96    | UDP-N-acetyl-alpha-D-galactosamine polypeptide N-acetylgalactosaminyltransferase 4, plays a role in protein amino acid O-linked glycosylation via serine and threonine                                     |
| 2520        | Human Druggable | GAS         | 1.98                 | 2.28    | Gastrin, a putative hormone that is involved in gastric acid secretion, cell proliferation, and signal transduction                                                                                        |
| 57798       | ROHG            | GATAD1      | 0.18                 | -1.93   | GATA zinc finger domain containing 1 (ocular development-associated gene)                                                                                                                                  |
| 23464       | ROHG            | GCAT        | 1.85                 | 1.95    | Glycine C-acetyltransferase (2-amino-3-ketobutyrate coenzyme A ligase), a putative transaminase that inhibits cell proliferation                                                                           |
| 81025       | ROHG            | GJA10       | 0.19                 | -2.12   | Member of the connexin family of gap junction channel proteins, has moderate similarity to gap junction protein alpha 1 (connexin 43, human GJA1), which is a transporter that acts in cell-cell signaling |

| Entrez Gene | Library         | Gene Symbol | Fold $\Delta$ ApoA-I | Z-Score | Gene Summary                                                                                                                                                                                                   |
|-------------|-----------------|-------------|----------------------|---------|----------------------------------------------------------------------------------------------------------------------------------------------------------------------------------------------------------------|
| 2735        | Human Druggable | GLI         | 1.84                 | 1.92    | GLI family zinc finger 1, a transcriptional regulator that acts in central nervous system development, promotes cell proliferation, upregulated in prostate, breast, and several neoplasms                     |
| 148423      | ROHG            | GM117       | 3.15                 | 4.24    | Protein of unknown function, has strong similarity to uncharacterized mouse 2410004B18Rik                                                                                                                      |
| 26205       | ROHG            | GMEB2       | 2.52                 | 3.45    | Glucocorticoid modulatory element binding protein 2, an RNA polymerase II transcription factor that binds sequence specific promoter elements in a complex with GMEB1 to mediate transcription of target genes |
| 2770        | GPCR            | GNAI1       | 1.87                 | 1.95    | Gi1 protein alpha subunit, a delta type-opioid receptor binding protein                                                                                                                                        |
| 23015       | ROHG            | GOLGIN-67   | 1.97                 | 2.20    | Golgin 67, a Golgi apparatus-specific protein, may play a role in Golgi structure maintenance, may play a role in vesicle tethering or docking                                                                 |
| 55105       | ROHG            | GPATC2      | 2.02                 | 2.34    | Member of the G-patch domain family, has strong similarity to uncharacterized mouse Gpatc2                                                                                                                     |
| 2820        | Human Druggable | GPD2        | 1.87                 | 1.99    | Glycerol-3-phosphate dehydrogenase 2 mitochondrial, acts in glycolysis, and oxygen and ROS metabolism, regulates fatty acid oxidation, decreased activity correlates with type 2 diabetes                      |
| 11245       | GPCR            | GPR         | 2.51                 | 3.38    | Putative G protein-coupled receptor                                                                                                                                                                            |
| 10149       | GPCR            | GPR64       | 1.91                 | 2.04    | G protein-coupled receptor 64, an epididymal-specific member of the class B secretin-like G protein-coupled receptor family                                                                                    |
| 8477        | GPCR            | GPR65       | 1.93                 | 2.09    | G protein-coupled receptor 65, a putative caspase activator that acts in apoptosis, cell proliferation, and neurogenesis                                                                                       |

| Entrez Gene | Library         | Gene Symbol | Fold $\Delta$ ApoA-I | Z-Score | Gene Summary                                                                                                                                                                                                                                     |
|-------------|-----------------|-------------|----------------------|---------|--------------------------------------------------------------------------------------------------------------------------------------------------------------------------------------------------------------------------------------------------|
| 8111        | GPCR            | GPR68       | 1.88                 | 1.98    | G protein-coupled receptor 68, an Edg1 sphingosine 1 phosphate receptor binding protein that elevates intracellular calcium and activates MAP kinases, inhibits cell proliferation, regulates proton induced prostaglandin I2 production         |
| 2831        | GPCR            | GPR7        | 1.99                 | 2.23    | Neuropeptides B-W receptor 1, acts in activation of MAPK activity, elevation of cytosolic calcium ion concentration, generation of precursor metabolites and energy, neuropeptide signaling pathway, and regulation of adenylyl cyclase activity |
| 10887       | GPCR            | GPR73       | 2.08                 | 2.42    | Prokineticin receptor 1, a GPCR that elevates cytosolic Ca <sup>2+</sup> , activates MAPK, may play a role in angiogenesis, nociception, placenta development, and smooth muscle contraction                                                     |
| 128674      | GPCR            | GPR73L1     | 1.96                 | 2.15    | Prokineticin receptor 2, a GPCR that acts in the androgen metabolism, and neurogenesis, regulates hormone secretion, ion transport, and locomotion                                                                                               |
| 10886       | GPCR            | GPR74       | 2.05                 | 2.34    | Neuropeptide FF receptor 2, a GPCR that binds neuropeptides AF and FF (NPFF), RFamide-related peptides (C7orf9), and prolactin releasing peptide (PRH), inhibits adenylyl cyclase and stimulates intracellular Ca <sup>2+</sup> flux             |
| 10888       | GPCR            | GPR83       | 2.16                 | 2.59    | G protein-coupled receptor 83, acts in the insulin receptor signaling pathway                                                                                                                                                                    |
| 2939        | ROHG            | GSTA2       | 2.01                 | 2.48    | Glutathione S-transferase A2, catalyzes conjugation of glutathione to toxic compounds, mediates detoxification of electrophilic xenobiotics                                                                                                      |
| 373156      | ROHG            | GSTK1       | 2.05                 | 2.39    | Glutathione S-transferase kappa 1, exhibits glutathione transferase and glutathione peroxidase activities, predicted to function in cellular and lipid metabolisms                                                                               |
| 2975        | Human Druggable | GTF3C1      | 1.91                 | 2.06    | General transcription factor IIIC polypeptide 1 alpha subunit 220kD, a transcription factor TFIIC subunit, required for transcription from the RNA polymerase III promoter                                                                       |

| Entrez Gene | Library         | Gene Symbol | Fold $\Delta$ ApoA-I | Z-Score | Gene Summary                                                                                                                                                                                                     |
|-------------|-----------------|-------------|----------------------|---------|------------------------------------------------------------------------------------------------------------------------------------------------------------------------------------------------------------------|
| 23498       | ROHG            | HAAO        | 2.04                 | 2.37    | 3 hydroxyanthranilate 3 4 dioxygenase, an electron carrier that may play a role in quinolinate synthetase A activity                                                                                             |
| 3033        | Human Druggable | HADHSC      | 1.95                 | 2.16    | Hydroxyacyl-Coenzyme A dehydrogenase, acts in fatty acid beta-oxidation, insulin secretion, and steroid hormone metabolism                                                                                       |
| 57817       | Human Druggable | HAMP        | 1.82                 | 1.91    | Hepcidin antimicrobial peptide, acts in cellular iron ion homeostasis                                                                                                                                            |
| 23438       | ROHG            | HARSL       | 2.12                 | 2.56    | Histidyl-tRNA synthetase 2 mitochondrial, a putative ATP binding protein that may play a role in the regulation of translation and histidyl-tRNA aminoacylation                                                  |
| 3047        | Human Druggable | HBG1        | 1.97                 | 2.26    | Hemoglobin gamma A, plays a role in erythropoiesis, may be associated with hemoglobin complex                                                                                                                    |
| 10542       | ROHG            | HBXIP       | 2.05                 | 2.20    | Hepatitis B virus x-interacting protein, a transcription coactivator that regulates centrosome dynamics and spindle assembly, induces NF-kappaB transcription factor activity and inactivates caspase 9 activity |
| 25875       | Human Druggable | HCCR1       | 1.80                 | 1.97    | LETM1 domain containing 1, involved in protein stabilization, may mediate ubiquitin-dependent protein catabolism, regulation of growth, and transcription                                                        |
| 79654       | ROHG            | HECTD3      | 1.93                 | 2.18    | HECT domain containing 3, likely facilitates cell cycle progression via regulating ubiquitination and degradation of Tara (TRIOBP)                                                                               |
| 57493       | ROHG            | HEG         | 0.14                 | -2.02   | HEG homolog 1; mRNA expression is reduced in malignant serous epithelial ovarian tumors                                                                                                                          |
| 3097        | Human Druggable | HIVEP2      | 1.92                 | 2.10    | Human immunodeficiency virus type I enhancer binding protein 2, an RNA polymerase II transcription factor that promotes cell proliferation, involved in response to extracellular stimulus and retinoic acid     |

| Entrez Gene | Library              | Gene Symbol | Fold $\Delta$ ApoA-I | Z-Score | Gene Summary                                                                                                                                                                                                        |
|-------------|----------------------|-------------|----------------------|---------|---------------------------------------------------------------------------------------------------------------------------------------------------------------------------------------------------------------------|
| 3188        | ROHG                 | HNRPH2      | 1.80                 | 1.96    | Heterogeneous nuclear ribonucleoprotein H2 (H'), a component of mRNA cleavage and polyadenylation specificity factor complex and an RNA binding protein that recognizes the mRNA motifs GGGA and GGGGGC             |
| 3203        | ROHG                 | HOXA6       | 2.02                 | 2.51    | Homeobox A6, a putative transcription factor that plays a role in embryonic pattern specification and skeletal system development                                                                                   |
| 3211        | Human Druggable      | HOXB1       | 2.09                 | 2.50    | Homeobox B1, a transcription factor that plays a role in pattern specification, facial nerve structural organization, and brain development                                                                         |
| 3227        | Human Druggable      | HOXC11      | 2.18                 | 2.71    | Homeobox C11, a transcription factor that plays a role in ureteric bud development                                                                                                                                  |
| 3224        | ROHG                 | HOXC8       | 2.25                 | 3.08    | Homeobox C8, a transcriptional repressor that plays a role in skeletal system development, pattern specification, and cartilage differentiation                                                                     |
| 3268        | ROHG                 | HRBL        | 0.18                 | -2.02   | HIV-1 Rev binding protein-like, a cellular cofactor of the human immunodeficiency virus Rev protein, contains a zinc finger domain and four EH domain-binding NPF motifs                                            |
| 27102       | Human Protein Kinase | HRI         | 1.98                 | 2.20    | Eukaryotic translation initiation factor 2 alpha kinase 1, plays a role in protein amino acid phosphorylation, involved in response to nitric oxide                                                                 |
| 9953        | ROHG                 | HS3ST3B1    | 2.01                 | 2.13    | Heparan sulfate 3 O sulfotransferase 3B1, a putative integral plasma membrane protein that plays a role in heparan sulfate proteoglycan biosynthetic process                                                        |
| 11077       | Human Druggable      | HSF2BP      | 2.61                 | 3.70    | Heat shock transcription factor 2 binding protein                                                                                                                                                                   |
| 3363        | GPCR                 | HTR7        | 1.96                 | 2.15    | 5-hydroxytryptamine receptor 7, activates MAPK activity and adenylyl cyclase activity by serotonin receptor signaling pathway, plays a role in neuron projection development, micturition, and behavioral functions |

| Entrez Gene | Library         | Gene Symbol | Fold $\Delta$ ApoA-I | Z-Score | Gene Summary                                                                                                                                                                                                                                        |
|-------------|-----------------|-------------|----------------------|---------|-----------------------------------------------------------------------------------------------------------------------------------------------------------------------------------------------------------------------------------------------------|
| 127544      | ROHG            | IBRDC3      | 3.28                 | 4.51    | Protein with high similarity to human RNF19A, which is an ubiquitin ligase that regulates caspase activity, release of cytochrome C, and programmed cell death, contains a C3HC4 type (RING) zinc finger                                            |
| 3421        | ROHG            | IDH3G       | 1.83                 | 2.05    | Isocitrate dehydrogenase 3 (NAD <sup>+</sup> ) gamma, catalyzes the oxidative decarboxylation of isocitrate into alpha-ketoglutarate in the TCA cycle                                                                                               |
| 3430        | Human Druggable | IFI35       | 1.92                 | 2.10    | Interferon-induced protein 35, binds to transcription factor, exhibits homodimer and heterodimerization activity                                                                                                                                    |
| 23765       | Human Druggable | IL17R       | 2.07                 | 2.49    | Interleukin 17 receptor A, acts in the regulation of interleukin-6 biosynthetic process and protein binding                                                                                                                                         |
| 29949       | Human Druggable | IL19        | 2.28                 | 2.97    | Interleukin 19, a cytokine that induces apoptosis, IL-6, and TNF production,                                                                                                                                                                        |
| 3576        | GPCR            | IL8         | 2.15                 | 2.57    | Interleukin 8, acts in immune response, aberrantly expressed in digestive, lung, and immune system diseases, Behcet syndrome, multiple sclerosis, diabetes, pancreatitis, ischemia, psoriasis, arteriosclerosis, myelofibrosis, and several cancers |
| 51147       | Human Druggable | ING4        | 2.16                 | 2.64    | Inhibitor of growth family member 4, mediates G2-M transition of mitotic cell cycle, chromatin remodeling, and induction of apoptosis, regulates histone acetylation                                                                                |
| 3675        | Human Druggable | ITGA3       | 2.11                 | 2.58    | Integrin alpha 3, a laminin receptor that plays a role in small GTPase mediated signaling, cell proliferation, migration, and adhesion, protein complex assembly, and phagocytosis                                                                  |
| 3699        | ROHG            | ITIH3       | 1.86                 | 2.12    | Inter-alpha inhibitor H3, a putative endopeptidase inhibitor                                                                                                                                                                                        |
| 84962       | ROHG            | JUB         | 3.11                 | 4.18    | Jub ajuba homolog, an enzyme regulator and a signal transducer that plays a role in activation of Rac GTPase, homophilic cell adhesion, lamellipodium assembly, and G2-M transition of mitotic cell cycle, inhibits transcription                   |

| Entrez Gene | Library         | Gene Symbol | Fold $\Delta$ ApoA-I | Z-Score | Gene Summary                                                                                                                                                             |
|-------------|-----------------|-------------|----------------------|---------|--------------------------------------------------------------------------------------------------------------------------------------------------------------------------|
| 7881        | Human Druggable | KCNAB1      | 1.83                 | 2.04    | Potassium voltage-gated channel shaker-related subfamily beta member 1, a potassium channel inhibitor that may act in cardiomyocyte excitement                           |
| 23415       | Human Druggable | KCNH4       | 1.82                 | 1.91    | Potassium voltage-gated channel subfamily H (eag-related) member 4, a ion channel that may play a role in synaptic transmission                                          |
| 27133       | Human Druggable | KCNH5       | 1.84                 | 2.29    | Potassium voltage-gated channel subfamily H member 5, plays a role in potassium ion transport                                                                            |
| 23023       | Human Druggable | KIAA0779    | 1.87                 | 2.15    | Transmembrane and coiled-coil domain family 1, a predicted DNA or RNA binding protein                                                                                    |
| 57592       | ROHG            | KIAA1441    | 2.02                 | 2.38    | Zinc finger protein 687; gene translocation with the RUNX1 partner gene is associated with acute myeloid leukemia                                                        |
| 57683       | ROHG            | KIAA1571    | 2.13                 | 2.66    | Protein of unknown function                                                                                                                                              |
| 57701       | ROHG            | KIAA1602    | 0.14                 | -2.02   | Member of the amino acid permease family of membrane transporters, has moderate similarity to human SLC7A1                                                               |
| 11278       | Human Druggable | KLF12       | 2.45                 | 3.31    | Kruppel-like factor 12, a transcriptional corepressor, modulates activity of AP-2alpha promoter                                                                          |
| 3816        | ROHG            | KLK1        | 1.80                 | 1.97    | Kallikrein 1, a peptidase that cleaves kininogen, functions in glucose homeostasis, heart contraction, and vasoconstriction                                              |
| 25984       | ROHG            | KRT23       | 2.44                 | 3.28    | Protein with moderate similarity to keratin 19                                                                                                                           |
| 9355        | ROHG            | LHX2        | 1.93                 | 1.96    | LIM homeobox 2, a transcription factor that acts in hair follicle development, thalamocortical tract pathfinding, and erythropoiesis                                     |
| 3978        | Human Druggable | LIG1        | 1.85                 | 1.95    | Ligase I DNA ATP-dependent, acts in DNA replication and base excision repair                                                                                             |
| 4009        | Human Druggable | LMX1A       | 2.18                 | 2.71    | LIM homeobox transcription factor 1 alpha, a transcription activator that plays a role in neural plate development, neuron differentiation, and regulation of cell cycle |
| 120224      | ROHG            | LOC120224   | 2.34                 | 2.64    | Member of the DUF716 domain of unknown function family                                                                                                                   |

| Entrez Gene | Library | Gene Symbol | Fold $\Delta$ ApoA-I | Z-Score | Gene Summary                                                                                                                                                                                                            |
|-------------|---------|-------------|----------------------|---------|-------------------------------------------------------------------------------------------------------------------------------------------------------------------------------------------------------------------------|
| 126731      | ROHG    | LOC126731   | 1.98                 | 1.94    | Protein of unknown function, has high similarity to uncharacterized mouse 1700054N08Rik                                                                                                                                 |
| 150084      | ROHG    | LOC150084   | 1.97                 | 1.92    | Protein of unknown function, has high similarity to uncharacterized rat LOC304000                                                                                                                                       |
| 150946      | ROHG    | LOC150946   | 2.26                 | 2.48    | family with sequence similarity 59, member B (NCBI)                                                                                                                                                                     |
| 163233      | ROHG    | LOC163233   | 1.88                 | 2.08    | Protein with high similarity to human ZNF85, which is involved in the negative regulation of transcription from RNA polymerase II promoter                                                                              |
| 163782      | ROHG    | LOC163782   | 1.94                 | 2.22    | Protein containing three ankyrin repeats, which may mediate protein binding, has low similarity to ankyrin repeat domain 15, which acts in cell cycle arrest, regulation of cell shape, and actin filament organization |
| 203427      | ROHG    | LOC203427   | 2.23                 | 2.93    | Member of the mitochondrial carrier protein family of membrane transporters                                                                                                                                             |
| 221955      | ROHG    | LOC221955   | 1.81                 | 1.92    | Diacylglycerol lipase beta, a predicted diacylglycerol-lipase that may act in biosynthesis of the endocannabinoid 2-arachidnoyl glycerol                                                                                |
| 253012      | ROHG    | LOC253012   | 2.74                 | 4.14    | HEPACAM family member 2, plays a likely role in mitosis and nuclear morphology, localizes to mitotic spindles and centrosomes                                                                                           |
| 339448      | ROHG    | LOC339448   | 0.17                 | -1.96   | Protein of unknown function, has high similarity to uncharacterized mouse A430005L14Rik                                                                                                                                 |
| 339453      | ROHG    | LOC339453   | 2.44                 | 3.44    | Chromosome 1 open reading frame 70                                                                                                                                                                                      |
| 346673      | ROHG    | LOC346673   | 0.26                 | -1.95   | Protein with high similarity to stimulated by retinoic acid gene 8                                                                                                                                                      |
| 349136      | ROHG    | LOC349136   | 1.76                 | 1.99    | Protein containing eight WD domain G-beta repeats, has weak similarity to C. elegans C14B1.4, which positively regulates histone H3-K4 methylation                                                                      |
| 375035      | ROHG    | LOC375035   | 1.89                 | 2.11    | Member of the SFT2-like protein family, which may be transmembrane proteins                                                                                                                                             |
| 51760       | ROHG    | LOC51760    | 1.87                 | 1.98    | Protein containing two C2 domains, which may be involved in calcium-dependent phospholipid binding                                                                                                                      |



| Entrez Gene | Library              | Gene Symbol | Fold $\Delta$ ApoA-I | Z-Score | Gene Summary                                                                                                                                                                                                                |
|-------------|----------------------|-------------|----------------------|---------|-----------------------------------------------------------------------------------------------------------------------------------------------------------------------------------------------------------------------------|
| 63928       | ROHG                 | LOC63928    | 1.82                 | 1.92    | Calcineurin B homologous protein 2, binds to and stimulates phosphatase activity of calcineurin A, regulates sodium ion transport, and inhibits serum deprivation-induced cell death by increasing intracellular pH         |
| 83468       | ROHG                 | LOC83468    | 1.97                 | 2.32    | Member of the glycosyl transferase family 8, which transfer sugar residues to donor molecules during lipopolysaccharide and glycogen biosynthesis                                                                           |
| 90167       | ROHG                 | LOC90167    | 2.17                 | 2.30    | FERM domain containing 7, plays a likely role in control of eye movement and gaze stability                                                                                                                                 |
| 91966       | ROHG                 | LOC91966    | 2.81                 | 3.58    | Chromosome X open reading frame 40A, interacts with MT2A                                                                                                                                                                    |
| 93343       | ROHG                 | LOC93343    | 2.07                 | 2.12    | Protein of unknown function, has strong similarity to uncharacterized mouse 1110012M11Rik                                                                                                                                   |
| 121227      | ROHG                 | LRIG3       | 2.28                 | 2.53    | Leucine-rich repeats and immunoglobulin-like domains 3, may regulate cell proliferation                                                                                                                                     |
| 92335       | Human Protein Kinase | LYK5        | 0.12                 | -1.97   | Protein kinase LYK5, a likely pseudokinase that regulates the kinase activity of LKB1 (STK11) and is required for LKB1-induced cell cycle arrest                                                                            |
| 4126        | Human Druggable      | MANBA       | 1.84                 | 1.93    | Mannosidase beta A lysosomal, may play a role in oligosaccharide metabolic process                                                                                                                                          |
| 4188        | ROHG                 | MDFI        | 1.98                 | 2.41    | MyoD family inhibitor, a putative transcriptional repressor that mediates cytoplasmic sequestering of transcription factor, regulates striated muscle development, inhibits release of sequestered calcium ion into cytosol |
| 78986       | Human Druggable      | MGC1136     | 1.90                 | 2.46    | Dual specificity phosphatase 26, a protein phosphatase that binds the HSF4 transcription factor, promotes anaplastic thyroid cancer cell growth by inhibiting p38 MAPK (MAPK14) activity                                    |
| 84283       | ROHG                 | MGC13102    | 1.92                 | 2.43    | Protein of unknown function, has strong similarity to uncharacterized mouse 2310042N02Rik                                                                                                                                   |

| Entrez Gene | Library         | Gene Symbol | Fold $\Delta$ ApoA-I | Z-Score | Gene Summary                                                                                                                                                                                     |
|-------------|-----------------|-------------|----------------------|---------|--------------------------------------------------------------------------------------------------------------------------------------------------------------------------------------------------|
| 84315       | ROHG            | MGC13272    | 1.86                 | 2.26    | Protein with strong similarity to MON1 homolog A, which is required for trafficking of ferroportin and regulation of cellular iron content and has a fundamental role in the secretory apparatus |
| 84841       | ROHG            | MGC15634    | 2.19                 | 2.36    | Protein with high similarity to human ZNF85, which is a transcription repressor, member of the KRAB box family, contains many zinc finger C2H2 type repeats                                      |
| 84970       | ROHG            | MGC15882    | 2.75                 | 3.45    | Protein of unknown function                                                                                                                                                                      |
| 133383      | ROHG            | MGC33648    | 2.13                 | 2.23    | Protein of unknown function                                                                                                                                                                      |
| 256586      | ROHG            | MGC35274    | 2.08                 | 2.56    | Protein of unknown function, has strong similarity to uncharacterized mouse Lysmd2                                                                                                               |
| 79415       | ROHG            | MGC4368     | 0.12                 | -2.11   | Protein of unknown function, has strong similarity to uncharacterized mouse Bc017643                                                                                                             |
| 253769      | ROHG            | MGC43690    | 1.93                 | 2.22    | Protein containing two WD domain G-beta repeats                                                                                                                                                  |
| 79025       | ROHG            | MGC5356     | 1.91                 | 2.14    | Protein of unknown function, has strong similarity to uncharacterized mouse BC051628                                                                                                             |
| 4257        | Human Druggable | MGST1       | 1.89                 | 2.03    | Microsomal glutathione S-transferase 1, involved in aging and response to oxidative stress                                                                                                       |
| 4284        | Human Druggable | MIP         | 2.24                 | 2.88    | Major intrinsic protein of lens fiber, a calmodulin binding water channel that plays a role in visual perception and water transport                                                             |
| 4297        | Human Druggable | MLL         | 1.99                 | 2.26    | Mixed-lineage leukemia, a histone methyltransferase that acts in maintenance of Hox gene expression during embryonic development, regulates anteroposterior axis formation                       |
| 58508       | Human Druggable | MLL3        | 0.30                 | -1.92   | Myeloid-lymphoid or mixed-lineage leukemia 3, a transcription coactivator that mediates histone H3-K4 methylation                                                                                |
| 4299        | ROHG            | MLLT2       | 1.83                 | 2.03    | AF4-FMR2 family member 1, a transcription activator that acts in histone methylation, eye, and hindbrain development, regulates insulin-like growth factor receptor signaling pathway            |

| Entrez Gene | Library              | Gene Symbol | Fold $\Delta$ ApoA-I | Z-Score | Gene Summary                                                                                                                                                                                                                                    |
|-------------|----------------------|-------------|----------------------|---------|-------------------------------------------------------------------------------------------------------------------------------------------------------------------------------------------------------------------------------------------------|
| 143098      | ROHG                 | MPP7        | 1.97                 | 1.92    | Membrane protein palmitoylated 7 (MAGUK p55 subfamily member 7), forms a complex with LIN7A or LIN7C and DLG1 that regulates stability and localization of DLG1 to cell junctions, binds DLG1 to facilitate epithelial tight junction formation |
| 3140        | ROHG                 | MR1         | 0.21                 | -1.95   | MHC class I-like antigen MR-1, a beta-2-microglobulin binding protein that plays a role in the regulation of MHC class I expression                                                                                                             |
| 65080       | ROHG                 | MRPL44      | 2.04                 | 2.45    | Member of the RNase3 domain containing family, contains a double-stranded RNA binding domain                                                                                                                                                    |
| 92259       | ROHG                 | MRPS36      | 2.79                 | 3.54    | Mitochondrial ribosomal protein S36, a putative component of the small subunit of the mitochondrial ribosome                                                                                                                                    |
| 10797       | ROHG                 | MTHFD2      | 2.09                 | 2.28    | Methylenetetrahydrofolate dehydrogenase (NADP+ dependent) 2 methenyltetrahydrofolate cyclohydrolase, an electron carrier that may act in utero embryonic development, mitochondrion organization, and translation                               |
| 219402      | ROHG                 | MTIF3       | 2.10                 | 2.60    | Mitochondrial translational initiation factor 3, binds to mitochondrial ribosomal subunits, mediates dissociation of 55S ribosomal subunits and fMet-tRNA bound to mitochondrial 28S subunits                                                   |
| 23026       | ROHG                 | MYR8        | 2.15                 | 2.61    | Protein with high similarity to myosin heavy chain Myr 8, an unconventional myosin that binds actin, contains five ankyrin repeats, a myosin head domain (motor domain), and an IQ calmodulin-binding motif                                     |
| 55577       | Human Protein Kinase | NAGK        | 0.12                 | -1.97   | N-acetylglucosamine kinase, an enzyme that phosphorylates N-acetylglucosamine and N-acetylmannosamine, binds to ADP and glucose, plays a role in carbohydrate phosphorylation                                                                   |
| 22861       | Human Druggable      | NALP1       | 1.98                 | 2.40    | NLR family pyrin domain containing 1, binds to ATP and caspase, plays a role in caspase activation and induction of apoptosis by granzyme                                                                                                       |

| Entrez Gene | Library              | Gene Symbol | Fold $\Delta$ ApoA-I | Z-Score | Gene Summary                                                                                                                                                                                                                            |
|-------------|----------------------|-------------|----------------------|---------|-----------------------------------------------------------------------------------------------------------------------------------------------------------------------------------------------------------------------------------------|
| 222236      | ROHG                 | NAPE-PLD    | 2.36                 | 3.24    | N-acyl phosphatidylethanolamine phospholipase D, hydrolyzes N-acyl phosphatidylethanolamines to the corresponding N-acylethanolamines, acts in neurotransmitter biosynthesis and embryo implantation and development                    |
| 26151       | ROHG                 | NAT9        | 2.12                 | 2.55    | N-acetyltransferase 9, a predicted N-acetyltransferase whose defective regulation by the RUNX1 transcription factor may be a determinant for susceptibility to psoriasis                                                                |
| 81565       | Human Druggable      | NDEL1       | 2.30                 | 3.19    | NUDE-like protein, an endopeptidase that acts in microtubule anchoring at centrosome and chromosome segregation, regulates mitotic cell cycle, neurogenesis, and exocytosis                                                             |
| 3340        | ROHG                 | NDST1       | 2.19                 | 2.91    | N-deacetylase-N-sulfotransferase 1, a bifunctional enzyme that catalyzes both N-deacetylation and N-sulfation of glucosamine of glycosaminoglycan in heparan sulfate                                                                    |
| 4747        | Human Druggable      | NEFL        | 1.83                 | 2.03    | Neurofilament light polypeptide, a structural constituent of the cytoskeleton                                                                                                                                                           |
| 29922       | Human Protein Kinase | NME7        | 1.88                 | 1.96    | Protein containing two nucleoside diphosphate kinase domains, has low similarity to a region of thioredoxin domain containing 3, a microtubule binding protein with ciliary function                                                    |
| 9111        | Human Druggable      | NMI         | 1.98                 | 2.24    | N-myc interactor, a transcription corepressor that is involved in JAK-STAT cascade, protein stabilization, and inflammatory response                                                                                                    |
| 10316       | GPCR                 | NMUR1       | 2.10                 | 2.46    | Neuromedin U receptor 1, a peptide receptor that plays a role in elevation of cytosolic calcium ion concentration, inflammatory response, and regulation of cytokine production, involved in response to bacterium and hormone stimulus |
| 57414       | ROHG                 | NPD007      | 1.85                 | 1.99    | Rhomboid domain containing 2, positively regulates cell proliferation                                                                                                                                                                   |

| Entrez Gene | Library         | Gene Symbol | Fold $\Delta$ ApoA-I | Z-Score | Gene Summary                                                                                                                                                                                                                         |
|-------------|-----------------|-------------|----------------------|---------|--------------------------------------------------------------------------------------------------------------------------------------------------------------------------------------------------------------------------------------|
| 64324       | Human Druggable | NSD1        | 1.84                 | 2.29    | Nuclear receptor binding SET domain protein 1, a transcription coactivator that plays a role in skeletal development and cell growth                                                                                                 |
| 9423        | Human Druggable | NTN1        | 0.12                 | -2.05   | Netrin-1, regulates angiogenesis and plays a role in axon guidance, inhibits RhoA GTPase activity, highly expressed in non small cell lung cancer                                                                                    |
| 83894       | ROHG            | NYD-SP14    | 3.25                 | 4.45    | Protein containing four type 2 and four type 1 tetratricopeptide repeats, which may mediate protein-protein interactions                                                                                                             |
| 84654       | ROHG            | NYD-TSP1    | 2.42                 | 2.79    | Spermatogenic leucine zipper 1, a putative transcription factor                                                                                                                                                                      |
| 22953       | Human Druggable | P2RX2       | 1.89                 | 2.08    | Purinergic receptor P2X ligand-gated ion channel 2, an ATP-gated cation channel that plays a role in calcium ion transport                                                                                                           |
| 201161      | ROHG            | P30         | 2.10                 | 2.62    | Centromere protein V, acts in directional cell motility and progression of mitosis as a scaffolding molecule linking microtubules and Src family kinases, required for centromere organization, chromosome alignment and cytokinesis |
| 26986       | ROHG            | PABPC1      | 0.20                 | -2.09   | Poly(A)-binding protein cytoplasmic 1, binds to RNA, regulates cell migration, focal adhesion formation, and translation, may act in nucleocytoplasmic transport                                                                     |
| 55003       | ROHG            | PAK1IP1     | 1.96                 | 2.20    | PAK1 interacting protein 1, a serine-threonine protein kinase inhibitor that interacts with PAK1 to inhibit downstream JNK and NF-kappaB signaling pathways                                                                          |
| 5090        | Human Druggable | PBX3        | 1.70                 | 1.91    | Pre-B-cell leukemia homeobox 3, a enhancer binding transcription factor that acts in spinal cord and limb development, proprioception, locomotion, and perception of sound                                                           |
| 5097        | Human Druggable | PCDH1       | 2.56                 | 3.56    | Protocadherin 1, plays a role in cell adhesion and embryonic development                                                                                                                                                             |

| Entrez Gene | Library              | Gene Symbol | Fold $\Delta$ ApoA-I | Z-Score | Gene Summary                                                                                                                                                                                                                                  |
|-------------|----------------------|-------------|----------------------|---------|-----------------------------------------------------------------------------------------------------------------------------------------------------------------------------------------------------------------------------------------------|
| 26577       | ROHG                 | PCOLCE2     | 1.79                 | 2.08    | Procollagen C-endopeptidase enhancer 2, enhances cleavage of type II procollagen by the procollagen C-proteinases, BMP1 and TLL1, accelerates proteolytic processing of pro-apolipoprotein AI (APOA1) to play a likely role in HDL biogenesis |
| 79955       | ROHG                 | PDZK7       | 1.82                 | 1.94    | PDZ domain containing 7, a component of the protein network related to Usher syndrome                                                                                                                                                         |
| 5204        | Human Druggable      | PFDN5       | 1.84                 | 1.92    | Prefoldin subunit 5, a transcription corepressor that interacts and inhibits transcriptional activity of MYC, regulates cell proliferation                                                                                                    |
| 114770      | ROHG                 | PGLYRP2     | 2.00                 | 1.98    | Peptidoglycan recognition protein 2, a N-acetylmuramoyl-L-alanine amidase that mediates cell response to bacteria                                                                                                                             |
| 8225        | ROHG                 | PGPL        | 2.06                 | 2.22    | Pseudoautosomal GTP-binding protein-like, a putative GTP-binding protein                                                                                                                                                                      |
| 54681       | Human Druggable      | PH-4        | 2.08                 | 2.66    | Hypoxia inducible factor prolyl 4 hydroxylase, a putative oxygen sensor that responds to hypoxia                                                                                                                                              |
| 51230       | ROHG                 | PHF20       | 2.06                 | 2.41    | PHD finger protein 20, altered mRNA expression is observed in U937 macrophages following events that induce atherosclerosis                                                                                                                   |
| 5283        | ROHG                 | PIGH        | 2.23                 | 2.59    | Phosphatidylinositol glycan anchor biosynthesis class H, plays a role in GPI anchor biosynthesis and protein modification                                                                                                                     |
| 30849       | Human Protein Kinase | PIK3R4      | 2.13                 | 2.53    | Phosphoinositide-3-kinase regulatory subunit 4, forms a complex with and activates PtdIns 3-kinase, involved in macroautophagy induction, may be involved in protein trafficking and vesicle-mediated transport                               |
| 114780      | ROHG                 | PKD1L2      | 1.98                 | 1.93    | Polycystic kidney disease 1-like 2, binds specific G protein subunits                                                                                                                                                                         |
| 8605        | Human Druggable      | PLA2G4C     | 1.79                 | 1.95    | Phospholipase A2 group IVC, plays a role in metabolism of arachidonic acid, phosphatidylethanolamine, and prostaglandin, acts in phospholipid homeostasis                                                                                     |

| Entrez Gene | Library              | Gene Symbol | Fold $\Delta$ ApoA-I | Z-Score | Gene Summary                                                                                                                                                                                                                                              |
|-------------|----------------------|-------------|----------------------|---------|-----------------------------------------------------------------------------------------------------------------------------------------------------------------------------------------------------------------------------------------------------------|
| 22925       | Human Druggable      | PLA2R1      | 1.87                 | 2.13    | Phospholipase A2 receptor 1, a phospholipase A2 activator that may play a role in phospholipase-mediated melanocyte dendricity and pigmentation                                                                                                           |
| 5325        | Human Druggable      | PLAGL1      | 2.00                 | 2.29    | Pleomorphic adenoma gene-like 1, a transcription activator that acts in cell cycle arrest, cell surface receptor linked signal transduction, and induction of apoptosis                                                                                   |
| 59338       | Human Druggable      | PLEKHA1     | 2.01                 | 2.29    | Pleckstrin homology domain containing family A member 1, binds to phosphatidylinositol-3-4-bisphosphate, acts in B-cell receptor signaling pathway                                                                                                        |
| 5347        | Human Protein Kinase | PLK1        | 0.11                 | -1.99   | Polo-like kinase 1, an serine-threonine kinase that acts in Golgi organization, mitotic cell cycle G2-M transition DNA damage checkpoint, and protein amino acid phosphorylation,                                                                         |
| 10154       | Human Druggable      | PLXNC1      | 1.88                 | 2.05    | Plexin C1, a receptor for SEMA7A and virally-encoded semaphorins A39R and AHV, inhibits melanocyte spreading, involved in soluble CD100 (SEMA4D) mediated inhibition of monocyte migration                                                                |
| 5368        | ROHG                 | PNOC        | 2.26                 | 2.64    | Prepronociceptin, a neuropeptide hormone that activates MAPK activity, regulates chemotaxis, neutrophil degranulation, blood pressure, and heart contraction                                                                                              |
| 84172       | ROHG                 | POLR1B      | 2.19                 | 2.35    | Protein with strong similarity to mouse Rpo1-2, which inhibits apoptosis and plays a role in rRNA synthesis and nucleolus organization and biogenesis                                                                                                     |
| 64840       | Human Druggable      | PORCN       | 1.90                 | 2.05    | Porcupine homolog, a putative chaperone-like molecule that is involved in Wnt protein processing,                                                                                                                                                         |
| 5511        | Human Druggable      | PPP1R8      | 2.57                 | 4.29    | Protein phosphatase 1 regulatory (inhibitor) subunit 8, a magnesium-dependent endoribonuclease that interacts with EZH2 and EED to inhibit transcription, binds and targets PPP1CA and PPP1CC to nuclear speckles, acts in cleavage of RNase E substrates |

| Entrez Gene | Library         | Gene Symbol | Fold $\Delta$ ApoA-I | Z-Score | Gene Summary                                                                                                                                                                                                              |
|-------------|-----------------|-------------|----------------------|---------|---------------------------------------------------------------------------------------------------------------------------------------------------------------------------------------------------------------------------|
| 54886       | ROHG            | PRG-3       | 1.95                 | 2.16    | Protein with very strong similarity to plasticity-related protein 3 (rat Prg-3), member of the phosphatidic acid phosphatase-related (PAP2) phosphoesterase family                                                        |
| 10216       | Human Druggable | PRG4        | 2.18                 | 2.90    | Proteoglycan 4, plays a role in cell proliferation, may act in cell-matrix adhesion                                                                                                                                       |
| 5725        | Human Druggable | PTBP1       | 0.23                 | -1.90   | Polypyrimidine tract binding protein 1, plays a role in regulation of alternative splicing, translation, cell proliferation, and apoptosis, acts in G1-S phase cell cycle, focal adhesion formation and RNA stabilization |
| 169714      | ROHG            | QSCN6L1     | 2.03                 | 2.45    | Quiescin Q6 sulfhydryl oxidase 2, regulates the sensitivity of neuroblastoma cells to interferon-gamma (IFNG)-induced apoptosis, member of the sulfhydryl oxidase-Quiescin6 family                                        |
| 5865        | Human Druggable | RAB3B       | 0.26                 | -2.01   | RAB3B member RAS oncogene family, a GTPase that binds to calmodulin, functions in exocytosis, may play a role in vesicle-mediated transport                                                                               |
| 23637       | ROHG            | RABGAP1     | 1.95                 | 2.16    | RAB GTPase activating protein 1, a tubulin binding protein that plays a role in Rab protein signal transduction and microtubule nucleation, regulates mitotic cell cycle                                                  |
| 57610       | ROHG            | RANBP10     | 2.30                 | 3.05    | RAN binding protein 10, a transcription coactivator that plays a role in hemostasis, Ran protein signal transduction, and regulation of microtubule cytoskeleton organization                                             |
| 29098       | ROHG            | RANGNRF     | 2.37                 | 3.13    | RAN guanine nucleotide release factor, a Ran GTPase binding protein that mediates nuclear import, may play a role in intracellular protein transport                                                                      |
| 5914        | Human Druggable | RARA        | 1.88                 | 2.04    | Retinoic acid receptor alpha, a DNA binding protein that regulates transcription, chondrocyte differentiation, and cell cycle                                                                                             |



| Entrez Gene | Library         | Gene Symbol | Fold $\Delta$ ApoA-I | Z-Score | Gene Summary                                                                                                                                                                                                       |
|-------------|-----------------|-------------|----------------------|---------|--------------------------------------------------------------------------------------------------------------------------------------------------------------------------------------------------------------------|
| 5932        | Human Druggable | RBBP8       | 1.81                 | 1.98    | Retinoblastoma binding protein 8, a transcriptional corepressor that acts in DNA double-strand break repair, G2-M transition checkpoint, and in utero embryonic development                                        |
| 5948        | ROHG            | RBP2        | 2.70                 | 3.56    | Cellular retinol-binding protein 2, a fatty acid binding protein that may play a role in the transport of 9-cis retinoic acid to its nuclear receptor, increased serum level correlates with chronic renal failure |
| 5954        | ROHG            | RCN1        | 2.40                 | 2.93    | Reticulocalbin 1, binds to calcium ions                                                                                                                                                                            |
| 6001        | ROHG            | RGS10       | 2.22                 | 2.55    | Regulator of G protein signaling 10, binds and stimulates the GTPase activity of GNAI, involved in HTR1A-mediated signaling, regulates the activity of potassium channels and adenylyl cyclase                     |
| 22838       | ROHG            | RNF44       | 2.25                 | 2.85    | Protein with high similarity to RING finger protein OIP1, which binds to the sperm tail protein rat Odf1, contains a C3HC4 type (RING) zinc finger                                                                 |
| 10073       | Human Druggable | RNUT1       | 1.90                 | 2.06    | Snurportin-1, plays a role in cajal body organization and nucleocytoplasmic transport, involved in small nucleolar ribonucleoprotein complex assembly and snRNP protein import into nucleus                        |
| 4736        | ROHG            | RPL10A      | 0.20                 | -1.96   | Ribosomal protein L10a, a putative structural constituent of ribosome that shows cellular response to X-rays and fission neutron-ionizing radiation                                                                |
| 23521       | Human Druggable | RPL13A      | 0.19                 | -1.98   | Ribosomal protein L13a, binds to 3'-UTR mRNA and translation initiation factors and inhibits translation                                                                                                           |
| 6146        | ROHG            | RPL22       | 1.91                 | 1.91    | Ribosomal protein L22, a structural constituent of ribosome that plays a role in thymocyte development, regulates T cell apoptosis and CD4 and CD8-positive alpha-beta T cell differentiation                      |
| 6167        | Human Druggable | RPL37       | 0.12                 | -2.16   | Ribosomal protein L37, a putative ribosomal protein that may bind to zinc ion and may play a role in translation                                                                                                   |

| Entrez Gene | Library         | Gene Symbol | Fold $\Delta$ ApoA-I | Z-Score | Gene Summary                                                                                                                                                                                   |
|-------------|-----------------|-------------|----------------------|---------|------------------------------------------------------------------------------------------------------------------------------------------------------------------------------------------------|
| 6125        | Human Druggable | RPL5        | 0.12                 | -2.16   | Ribosomal protein L5, a structural constituent of ribosome that plays a role in translation and protein complex assembly                                                                       |
| 6235        | Human Druggable | RPS29       | 0.21                 | -1.95   | Ribosomal protein S29, a zinc ion binding protein that plays a role in the regulation of cell shape                                                                                            |
| 6242        | ROHG            | RTKN        | 2.57                 | 3.30    | Rhotekin, interacts with RHOA, plays a role in Rho protein signal transduction, I-kappaB kinase-NF-kappaB cascade, and regulation of survival gene product expression                          |
| 57142       | ROHG            | RTN4        | 1.91                 | 2.13    | Reticulon 4, a growth inhibitor that modulates growth cone motility, acts in neuron development and maturation                                                                                 |
| 9905        | ROHG            | RUTBC1      | 2.01                 | 2.13    | Small G protein signaling modulator 2, interacts with several members of the RAP and RAB small G protein superfamily to likely modulate their activity, contains a RUN domain and a TBC domain |
| 8607        | Human Druggable | RUVBL1      | 0.25                 | -2.06   | RuvB-like 1, a ATPase that forms complex with ACTL6A and RUVBL2, binds to ssRNA, ssDNA, and dsDNA, regulates histone acetyltransferase activity of TIP60, involved in H2AX dephosphorylation   |
| 6385        | Human Druggable | SDC4        | 2.29                 | 2.94    | Syndecan 4, involved in actin cytoskeleton organization, regulates inositol phospholipid binding and signaling, platelet aggregation, and dendritic cell motility                              |
| 6386        | ROHG            | SDCBP       | 2.15                 | 2.42    | Syndecan binding protein, an antigen binding protein that plays a role in cell migration, protein complex assembly, and intracellular protein transport                                        |
| 10640       | Human Druggable | SEC10L1     | 1.79                 | 1.93    | SEC10-like 1, a component of the exocyst complex, involved in the synthesis and delivery of secretory proteins in epithelial cells                                                             |
| 6404        | Human Druggable | SELPLG      | 1.91                 | 2.12    | Selectin P ligand, a kinase binding protein, mediates leukocyte adhesion and rolling, MAPK activation, inhibits hemopoiesis, may mediate hemostasis                                            |

| Entrez Gene | Library         | Gene Symbol | Fold $\Delta$ ApoA-I | Z-Score | Gene Summary                                                                                                                                                                                                   |
|-------------|-----------------|-------------|----------------------|---------|----------------------------------------------------------------------------------------------------------------------------------------------------------------------------------------------------------------|
| 10371       | Human Druggable | SEMA3A      | 1.84                 | 1.95    | Semaphorin 3A, a putative chemorepellent that acts in apoptosis, angiogenesis, and spine and organ development                                                                                                 |
| 462         | Human Druggable | SERPINC1    | 2.54                 | 3.50    | Antithrombin III, inhibits blood coagulation and angiogenesis                                                                                                                                                  |
| 114132      | Human Druggable | SIGLEC11    | 1.91                 | 2.09    | Sialic acid binding Ig-like lectin 11, a member of the CD33/Siglec-3-related Siglec family, binds alpha2-8-linked sialic acids and protein phosphatases SHP-1 and SHP-2                                        |
| 6490        | Human Druggable | SILV        | 2.18                 | 2.91    | Silver homolog, a putative structural molecule that acts in T cell activation, melanocyte differentiation, and epidermis development                                                                           |
| 201780      | ROHG            | SLC10A4     | 1.98                 | 2.34    | Solute carrier family 10 member 4, exhibits regulated expression in dopaminergic neurons of the developing ventral mesencephalon                                                                               |
| 121260      | ROHG            | SLC15A4     | 2.27                 | 2.51    | Solute carrier family 15 member 4, a histidine transporter that plays a role in di- and tripeptide transport, regulates nucleotide-binding oligomerization domain containing-1 dependent NF kappaB signaling   |
| 114789      | ROHG            | SLC25A25    | 4.09                 | 6.11    | Solute carrier family 25 mitochondrial carrier phosphate carrier member 25, a putative calcium ion binding protein that may play a role in mitochondrial transport, expressed in the liver and skeletal muscle |
| 10559       | ROHG            | SLC35A1     | 2.51                 | 3.17    | Solute carrier family 35 member A1, a CMP-sialic acid transmembrane transporter that mediates CMP-sialic acid transport and protein amino acid glycosylation                                                   |
| 7355        | ROHG            | SLC35A2     | 2.95                 | 4.08    | Solute carrier family 35 member A2, catalyzes the transport of UDP-N-acetylgalactosamine across the membrane, involved in galactose metabolism and E-selectin mediated cell-cell adhesion                      |
| 57181       | ROHG            | SLC39A10    | 2.14                 | 2.68    | Protein with moderate similarity to human SLC39A6, which plays a role in zinc ion transport, involved in cellular response to estrogen and progesterone                                                        |

| Entrez Gene | Library         | Gene Symbol | Fold $\Delta$ ApoA-I | Z-Score | Gene Summary                                                                                                                                                                                                                                 |
|-------------|-----------------|-------------|----------------------|---------|----------------------------------------------------------------------------------------------------------------------------------------------------------------------------------------------------------------------------------------------|
| 55630       | Human Druggable | SLC39A4     | 1.91                 | 2.13    | Solute carrier family 39 member 4, a zinc ion transporter                                                                                                                                                                                    |
| 84102       | ROHG            | SLC41A2     | 2.44                 | 2.85    | Solute carrier family 41 member 2, functions as a plasma membrane magnesium ion transporter                                                                                                                                                  |
| 9497        | ROHG            | SLC4A7      | 2.00                 | 2.11    | Solute carrier family 4 sodium bicarbonate cotransporter member 7, plays a role in bicarbonate transport and regulation of pH                                                                                                                |
| 9498        | ROHG            | SLC4A8      | 1.93                 | 1.95    | Solute carrier family 4 sodium bicarbonate cotransporter member 8, regulates pH, acts in eye and ear development and sensory perception                                                                                                      |
| 340024      | ROHG            | SLC6A19     | 1.84                 | 2.00    | Solute carrier family 6 member 19, an neutral L-amino acid secondary active transmembrane transporter that plays a role in leucine and sodium ion transport                                                                                  |
| 6534        | ROHG            | SLC6A7      | 2.04                 | 2.19    | Solute carrier family 6, an amino acid transmembrane transporter that plays a role in L-proline transport                                                                                                                                    |
| 23315       | ROHG            | SLC9A8      | 2.02                 | 2.32    | Protein with very strong similarity to mouse Slc9a8, which is a sodium-hydrogen antiporter that regulates pH                                                                                                                                 |
| 6578        | ROHG            | SLCO2A1     | 2.13                 | 2.37    | Solute carrier organic anion transporter family member 2A1, a prostaglandin transmembrane transporter that regulates prostaglandin uptake                                                                                                    |
| 10944       | ROHG            | SMAP        | 1.90                 | 2.04    | Protein of unknown function, has strong similarity to uncharacterized mouse 1110004F10Rik                                                                                                                                                    |
| 64094       | ROHG            | SMOC2       | 0.19                 | -1.91   | SPARC related modular calcium binding 2, plays a role in cell cycle progression by regulating integrin linked kinase (ILK) activity during G1 cell cycle progression, regulates growth factor induced cyclin D1 expression and DNA synthesis |
| 6643        | ROHG            | SNX2        | 2.15                 | 2.41    | Sorting nexin 2, a putative protein transporter that plays a role in retrograde transport from endosome to Golgi and embryonic development, regulates epidermal growth factor receptor signaling                                             |

| Entrez Gene | Library              | Gene Symbol | Fold $\Delta$ ApoA-I | Z-Score | Gene Summary                                                                                                                                                                                                                                                |
|-------------|----------------------|-------------|----------------------|---------|-------------------------------------------------------------------------------------------------------------------------------------------------------------------------------------------------------------------------------------------------------------|
| 65244       | ROHG                 | SPATS2      | 1.90                 | 2.10    | Protein with strong similarity to spermatogenesis associated serine-rich 2, which is developmentally regulated during spermatogenesis and downregulated in response to heat stress                                                                          |
| 90864       | ROHG                 | SPSB3       | 0.24                 | -2.01   | Member of the SPRY (SPLa and the RYanodine Receptor) domain containing family                                                                                                                                                                               |
| 6731        | Human Druggable      | SRP72       | 0.20                 | -1.97   | Signal recognition particle 72kDa, a putative ribonucleoprotein that undergoes cleavage by caspase during apoptosis                                                                                                                                         |
| 256435      | ROHG                 | ST6GALNAC3  | 1.92                 | 2.20    | ST6 N-acetylgalactosaminide alpha-2-6-sialyltransferase 3, catalyzes the formation of sialylglycoconjugates via transfer of the sialic acid group from CMP to one of several glycoconjugate acceptors, acts in O-glycan processing and protein modification |
| 6775        | Human Druggable      | STAT4       | 1.87                 | 2.02    | Signal transducer and activator of transcription 4, acts in Th-1 cell differentiation                                                                                                                                                                       |
| 412         | Human Druggable      | STS         | 1.85                 | 2.33    | Steroid sulfatase arylsulfatase C isozyme S, catalyzes the conversion of sulfated steroid precursors to estrogens                                                                                                                                           |
| 6822        | Human Druggable      | SULT2A1     | 1.97                 | 2.39    | Sulfotransferase family cytosolic 2A dehydroepiandrosterone preferring member 1, a sulfotransferase that plays a role in drug, steroid, and xenobiotic metabolic processes                                                                                  |
| 25870       | ROHG                 | SUMF2       | 1.98                 | 2.23    | Sulfatase modifying factor 2, member of the formylglycine-generating family subgroup B, activates sulfatase activity of arylsulfatase A                                                                                                                     |
| 6613        | RefSeq 27 Supplement | SUMO2       | 2.55                 | 3.38    | SMT3 suppressor of mif two 3 homolog 2, a small conjugating protein ligase that plays a role in proteolysis and protein modification process, regulates protein localization                                                                                |
| 255928      | ROHG                 | SYT14       | 1.89                 | 2.11    | Protein with high similarity to mouse Syt16, which is a phospholipid binding protein, contains two C2 domains, which may be involved in calcium-dependent phospholipid binding                                                                              |

| Entrez Gene | Library         | Gene Symbol | Fold $\Delta$ ApoA-I | Z-Score | Gene Summary                                                                                                                                                                                                           |
|-------------|-----------------|-------------|----------------------|---------|------------------------------------------------------------------------------------------------------------------------------------------------------------------------------------------------------------------------|
| 6875        | Human Druggable | TAF4B       | 1.95                 | 2.17    | TAF4b RNA polymerase II TATA box binding protein associated factor 105kDa, a transcription coactivator that plays a role in I-kappaB kinase-NF-kappaB cascade and antiapoptosis                                        |
| 221400      | ROHG            | TDRD6       | 2.09                 | 2.59    | Member of the tudor domain containing family, has a region of weak similarity to tudor domain containing 1 (mouse Tdrd1), which plays a role in male germ cell differentiation and nuage-germinal granule formation    |
| 64518       | ROHG            | TEKT3       | 1.98                 | 2.29    | Tektin 3, may play a role in sperm motility and in ciliary or flagellar motility                                                                                                                                       |
| 29841       | ROHG            | TFCP2L2     | 1.84                 | 1.92    | Grainyhead-like 1, a transcriptional activator that binds to the HIV-1 long terminal repeat                                                                                                                            |
| 7032        | ROHG            | TFF2        | 2.04                 | 2.17    | Trefoil factor 2, a signal transducer that acts in JNK cascade and wound healing, regulates calcium flux, chemotaxis, angiogenesis, and inflammation                                                                   |
| 116179      | ROHG            | TGM7        | 2.71                 | 3.38    | Transglutaminase 7, a putative transglutaminase that may bind calcium                                                                                                                                                  |
| 7057        | Human Druggable | THBS1       | 1.99                 | 2.30    | Thrombospondin 1, a metalloendopeptidase inhibitor that acts in angiogenesis, downregulated in coronary artery disease                                                                                                 |
| 57187       | ROHG            | THOC2       | 1.89                 | 2.08    | THO complex 2, a protein that is a component of the TREX complex, which may couple transcription to mRNA export                                                                                                        |
| 757         | ROHG            | TMEM50B     | 2.47                 | 3.61    | Member of the UPF0220 uncharacterized protein family, has very strong similarity to uncharacterized mouse Tmem50b                                                                                                      |
| 7124        | Human Druggable | TNF         | 1.87                 | 2.03    | Tumor necrosis factor, a proinflammatory cytokine that mediates responses to bacteria and injury                                                                                                                       |
| 55504       | Human Druggable | TNFRSF19    | 1.84                 | 1.96    | Tumor necrosis factor receptor superfamily member 19, mediates caspase-independent cell death, regulates mitochondrial membrane potential and cell shape, plays a role in vacuole organization and JNK (MAPK8) cascade |

| Entrez Gene | Library         | Gene Symbol | Fold $\Delta$ ApoA-I | Z-Score | Gene Summary                                                                                                                                                                                                                                               |
|-------------|-----------------|-------------|----------------------|---------|------------------------------------------------------------------------------------------------------------------------------------------------------------------------------------------------------------------------------------------------------------|
| 959         | Human Druggable | TNFSF5      | 1.92                 | 2.15    | CD40 ligand, a caspase activator, mediates T-helper 1 type immunity, isotype switching, and sphingomyelin catabolism                                                                                                                                       |
| 79155       | ROHG            | TNIP2       | 1.83                 | 1.95    | TNFAIP3 interacting protein 2, a transcription coactivator that binds to SMARCD1 and TEK, inhibits NFkappaB import into the nucleus, plays a role in G1-S transition of mitotic cell cycle and endothelial cell apoptosis                                  |
| 10040       | Human Druggable | TOM1L1      | 2.06                 | 2.47    | Target of myb1(chicken)-like 1, a TOLLIP binding protein that promotes keratinocyte differentiation, regulates cell proliferation and transcription, involved in the recruitment of clathrin to endosomes                                                  |
| 7158        | Human Druggable | TP53BP1     | 2.30                 | 2.97    | Tumor protein p53 binding protein 1, a transcriptional corepressor that is involved in DNA damage checkpoint, DNA repair and recombination, induction of apoptosis, and immune response                                                                    |
| 24150       | Human Druggable | TP53TG3     | 1.90                 | 2.05    | TP53 target gene 3, a TP53 inducible gene that may play a role in TP53 signaling                                                                                                                                                                           |
| 9697        | ROHG            | TRAM2       | 0.18                 | -2.15   | Translocation associated membrane protein 2, interacts with the SERCa2b calcium ATPase and with pro-alpha1 (I) collagen, involved in type I collagen synthesis and collagen assembly in hepatic stellate cells                                             |
| 10131       | Human Druggable | TRAP1       | 1.86                 | 2.00    | TNF receptor-associated protein 1, an ATPase that regulates protein folding and mitochondrial membrane potential, involved in regulation of TNF-mediated signaling, Stat3 tyrosine phosphorylation, cell adhesion, and gene expression, inhibits apoptosis |
| 287015      | ROHG            | TRIM42      | 2.27                 | 3.03    | Protein containing a C3HC4 type (RING) zinc finger, two B-box zinc finger domains, and a fibronectin type III domain, has a region of weak similarity to a region of human MID1                                                                            |
| 59341       | Human Druggable | TRPV4       | 1.87                 | 2.03    | Transient receptor potential cation channel subfamily V member 4, an osmosensor that promotes cytoskeletal remodeling, mediates blood pressure, Ca <sup>2+</sup> influx, and ATP release                                                                   |

| Entrez Gene | Library         | Gene Symbol | Fold $\Delta$ ApoA-I | Z-Score | Gene Summary                                                                                                                                                                                                                                                   |
|-------------|-----------------|-------------|----------------------|---------|----------------------------------------------------------------------------------------------------------------------------------------------------------------------------------------------------------------------------------------------------------------|
| 8100        | ROHG            | TTC10       | 2.38                 | 2.90    | Intraflagellar transport 88 homolog, may play a role in cell proliferation and excretion                                                                                                                                                                       |
| 81027       | Human Druggable | TUBB1       | 0.25                 | -2.03   | Tubulin beta 1, a putative structural molecule that may play a role in hemostasis                                                                                                                                                                              |
| 10381       | Human Druggable | TUBB4       | 0.19                 | -2.20   | Tubulin beta 3, may play a role in microtubule cytoskeleton organization and biogenesis                                                                                                                                                                        |
| 51061       | ROHG            | TXNDC11     | 1.94                 | 2.14    | Thioredoxin domain containing 11, interacts with DUOX1, DUOX2 and TPO                                                                                                                                                                                          |
| 51060       | ROHG            | TXNDC12     | 1.87                 | 1.98    | Thioredoxin domain containing 12 (endoplasmic reticulum), a protein-disulfide oxidoreductase                                                                                                                                                                   |
| 23071       | Human Druggable | TXNDC4      | 0.25                 | -2.05   | Endoplasmic reticulum protein 44, exhibits protein disulfide isomerase activity, plays a role in cell redox homeostasis, platelet activation, neuron differentiation, protein retention in ER lumen, 'de novo' protein folding, and calcium-mediated signaling |
| 7311        | Human Druggable | UBA52       | 0.13                 | -2.04   | Ubiquitin A-52 residue ribosomal protein fusion product 1, a putative structural constituent of ribosome that may play a role in protein ubiquitination                                                                                                        |
| 29914       | ROHG            | UBIAD1      | 2.04                 | 2.36    | UbiA prenyltransferase domain containing 1, inhibits cell proliferation                                                                                                                                                                                        |
| 7342        | ROHG            | UBP1        | 2.69                 | 3.55    | Upstream binding protein 1, a transcriptional regulator that regulates angiogenesis, may be involved in steroid biosynthetic process                                                                                                                           |
| 151887      | ROHG            | URB         | 2.55                 | 3.06    | Coiled coil domain containing 80, mediates growth inhibition in colon and pancreatic cancer cells                                                                                                                                                              |
| 7391        | Human Druggable | USF1        | 2.04                 | 2.37    | Upstream stimulatory factor 1, a transcription activator, regulates cell proliferation, loss of activity is associated with breast neoplasms                                                                                                                   |
| 7392        | Human Druggable | USF2        | 2.02                 | 2.33    | Upstream transcription factor 2 c-fos interacting, a transcription activator that plays a role in central nervous system and utero embryonic development and lactose biosynthetic process                                                                      |



| Entrez Gene | Library         | Gene Symbol | Fold $\Delta$ ApoA-I | Z-Score | Gene Summary                                                                                                                                                                                             |
|-------------|-----------------|-------------|----------------------|---------|----------------------------------------------------------------------------------------------------------------------------------------------------------------------------------------------------------|
| 10791       | ROHG            | VAMP5       | 1.94                 | 1.96    | Vesicle-associated membrane protein 5 (myobrevin), may function in vesicle-mediated transport, member of the Vamp subfamily of SNAREs                                                                    |
| 50853       | ROHG            | VILL        | 1.97                 | 2.22    | Villin-like, a putative structural constituent of cytoskeleton                                                                                                                                           |
| 55823       | ROHG            | VPS11       | 0.16                 | -1.98   | Vacuolar protein sorting 11, binds to syntaxin 7 (STX7), vacuolar protein sorting 18 (VPS18) and vacuolar protein sorting 16 (VPS16), may be involved in endosome to lysosome vesicle docking and fusion |
| 54832       | ROHG            | VPS13C      | 2.02                 | 2.32    | Vacuolar protein sorting 13 homolog C, may act in determining blood glucose levels after an oral glucose challenge, member of the VPS13 family                                                           |
| 26276       | ROHG            | VPS33B      | 2.29                 | 2.95    | Vacuolar protein sorting 33b, a late endosomal and lysosomal protein that is involved in in megakaryocyte and platelet alpha granule biogenesis                                                          |
| 7458        | Human Druggable | WBSCR1      | 2.22                 | 2.79    | Eukaryotic translation initiation factor 4H, plays a role in mRNA catabolism and regulation of translational initiation                                                                                  |
| 57539       | ROHG            | WDR35       | 1.95                 | 2.22    | Protein containing three WD domain G-beta repeats, has low similarity to C. elegans IFTA-1, which is involved in normal cilium axoneme biogenesis and retrograde intraflagellar transport                |
| 402415      | ROHG            | XKRX        | 2.16                 | 3.06    | Protein with moderate similarity to kell blood group precursor McLeod phenotype homolog                                                                                                                  |
| 11260       | Human Druggable | XPOT        | 1.93                 | 2.28    | Exportin tRNA, a Ran GTPase binding protein that binds and exports mature tRNAs from nucleus to the cytoplasm                                                                                            |
| 10897       | ROHG            | YIF1        | 2.27                 | 2.67    | Yip1 interacting factor, contains five predicted transmembrane domains, localizes to cis-Golgi and endoplasmic reticulum membranes                                                                       |
| 54877       | ROHG            | ZCCHC2      | 1.90                 | 2.05    | Protein of unknown function, has strong similarity to uncharacterized mouse Zcchc2                                                                                                                       |

| Entrez Gene | Library         | Gene Symbol | Fold $\Delta$ ApoA-I | Z-Score | Gene Summary                                                                                                                                                                                                                     |
|-------------|-----------------|-------------|----------------------|---------|----------------------------------------------------------------------------------------------------------------------------------------------------------------------------------------------------------------------------------|
| 64145       | ROHG            | ZFYVE20     | 2.37                 | 3.21    | Zinc finger FYVE domain containing 20, a phosphatidylinositol binding protein that interacts with RAB4A, plays a role in endosome transport, recruits VPS45A to Rab5-containing complexes, stimulates transferrin (TF) recycling |
| 7767        | ROHG            | ZNF224      | 2.00                 | 2.10    | Zinc finger protein 224, a transcription regulator                                                                                                                                                                               |
| 84364       | ROHG            | ZNF289      | 2.02                 | 2.02    | Protein with strong similarity to mouse Arfgap2, which is a small GTPase activator that plays a role in coatomer-mediated vesicular trafficking                                                                                  |
| 7586        | ROHG            | ZNF36       | 2.40                 | 2.94    | Protein with high similarity to zinc finger protein 192 (human ZNF192), which is involved in protein binding                                                                                                                     |
| 84307       | ROHG            | ZNF397      | 1.87                 | 2.30    | Zinc finger protein 397, contains a SCAN domain and nine C2H2 zinc finger repeats, forms homodimers and heterodimers with human ZNF396                                                                                           |
| 57711       | ROHG            | ZNF529      | 0.16                 | -1.98   | Protein with high similarity to human ZNF540, which is a transcription repressor that is involved in inactivation of MAPK activity, member of the KRAB box family, contains nine zinc finger C2H2 type repeats                   |
| 137209      | ROHG            | ZNF572      | 2.44                 | 2.84    | Protein with high similarity to human ZNF436, which inhibits transcriptional activities of SRE and AP1, contains 12 zinc finger C2H2 type repeats                                                                                |
| 55752       | Human Druggable | SEPT11      | 1.92                 | 2.10    | Septin 11, a GTPase that is involved in cytoskeleton organization, regulates cell size and Fc-gamma receptor mediated phagocytosis                                                                                               |
