# Supplementary material
Source: PubMed Central journal article supplement (PMC3585073)
Supplement: supp_M112.410092_jbc.M112.410092-2.pdf [file supp_M112.410092_jbc.M112.410092-2.pdf]

**Supplemental Table 2.** Convergence of human genes identified by GWAS to be associated with lipid risk factors and ApoA-I modulation by siRNA targeting the gene. The table includes the gene symbol, a brief description of the known function of the gene, the leading and other lipid traits identified with SNP associations in *Nature* 466, 707-713, the mean fold change in secreted ApoA-I that resulted from siRNA knockdown. Genes are listed according to magnitude of secreted ApoA-I change in the siRNA knock-down study and either HDL or triglycerides as the leading trait. HDL= high density lipoprotein, TG = triglycerides, TC= total cholesterol

| Gene Symbol | Description                                                                                                                                                                                                                                                   | Lead Trait | Other Traits | Fold $\Delta$ ApoA-I |
|-------------|---------------------------------------------------------------------------------------------------------------------------------------------------------------------------------------------------------------------------------------------------------------|------------|--------------|----------------------|
| PLTP        | Phospholipid transfer protein; a phosphatidylcholine transporter; controls cholesterol; triglyceride; and Vit-E levels; upregulation correlates with acute-phase reaction; arteriosclerosis; Alzheimer disease; alcoholism; type I and II diabetes mellitus   | HDL        | TG           | 1.86                 |
| MC4R        | Melanocortin 4 receptor; a GPCR that acts in regulation of food intake and body size; involved in bone resorption; copulation; and synaptic transmission; regulates fatty acid oxidation and blood pressure; gene mutation causes obesity                     | HDL        | --           | 1.82                 |
| GALNT2      | UDP N acetyl alpha D galactosamine polypeptide N acetylgalactosaminyltransferase 2; acts in protein amino acid O-linked glycosylation; increased expression in nonkeratinized conjunctival epithelium correlates with ocular cicatricial pemphigoid           | HDL        | TG           | 1.45                 |
| LPA         | Lipoprotein; a lipid transporter that regulates TGF-beta1 production; endothelial cell proliferation; and angiogenesis; acts in blood circulation; upregulated in rheumatoid arthritis; arteriosclerosis; stroke; ischemia; and Turner syndrome               | HDL        | --           | 1.42                 |
| AMPD3       | Adenosine monophosphate deaminase; plays a role in AMP catabolic process and purine nucleotide metabolic process; upregulated in lung adenocarcinoma                                                                                                          | HDL        | --           | 1.37                 |
| PGS1        | Phosphatidylglycerophosphate synthase 1; a likely phosphatidylglycerophosphate synthase that functions in mitochondrial phosphatidylglycerol metabolism; may play a role in apoptosis                                                                         | HDL        | --           | 1.36                 |
| ANGPTL4     | Angiopoietin-like 4; a secreted glycoprotein that inhibits lipoprotein lipase activity; triglyceride catabolism; endothelial cell apoptosis; and stress fiber assembly; acts in oxidative stress response; mRNA is upregulated in renal and breast carcinomas | HDL        | --           | 1.33                 |

| Gene Symbol | Description                                                                                                                                                                                                                                                 | Lead Trait | Other Traits | Fold $\Delta$ ApoA-I |
|-------------|-------------------------------------------------------------------------------------------------------------------------------------------------------------------------------------------------------------------------------------------------------------|------------|--------------|----------------------|
| TRPS1       | Trichorhinophalangeal syndrome I; a transcription regulator that acts in Wnt signaling; cell proliferation; and skeletal system development; upregulated in breast cancer; gene mutation correlates with Langer-Giedion syndrome and osteochondrodysplasias | HDL        | --           | 1.30                 |
| LCAT        | Lecithin cholesterol acyltransferase; acts in cholesterol and lipoprotein metabolic process; aberrant expression correlates with diabetes mellitus and kidney diseases; gene mutation causes Tangier disease associated with hyperlipoproteinemia type II   | HDL        | --           | 1.29                 |
| COBLL1      | COBL-like 1; negatively regulates apoptosis; altered mRNA expression may correlate with survival probability associated with malignant pleural mesothelioma                                                                                                 | HDL        | --           | 1.22                 |
| SCARB1      | Scavenger receptor class B member I; a lipid transporter that acts in cholesterol metabolism; upregulated in arteriosclerosis; gene polymorphism is associated with hyperlipoproteinemia type II; downregulated in adrenal cortex neoplasms and carcinoma   | HDL        | --           | 1.19                 |
| ABCA8       | ATP binding cassette subfamily A member 8; an ATPase that directly drives the active transport of a substance across a membrane; plays a role in transporting xenobiotics; decreased mRNA expression is associated with psoriasis                           | HDL        | --           | 1.18                 |
| LRP4        | Low density lipoprotein receptor-related protein 4; binds to LDL receptor; regulates canonical Wnt; BMP; and smoothed signaling and bone mineralization; acts in kidney and limb development; gene mutation causes Cenani-Lenz syndrome and sclerosteosis   | HDL        | --           | 1.17                 |
| PDE3A       | Phosphodiesterase 3A cGMP-inhibited; a phosphoric diester hydrolase that plays a role in activation of protein kinase activity; oocyte maturation; regulates apoptosis; cAMP catabolism; and protein localization; downregulated in heart failure           | HDL        | --           | 1.12                 |
| C6orf106    | Protein of unknown function; has a region of low similarity to C. elegans C36E6.2; which is involved in growth rate regulation; larval development; locomotory behavior; and egg-laying                                                                     | HDL        | --           | 1.02                 |
| SLC39A8     | Solute carrier family 39 member 8; a putative metallopeptidase that mediates zinc ion transport; may play a role in cytokine and chemokine mediated signaling pathway                                                                                       | HDL        | --           | 1.02                 |
| PABPC4      | Poly(A)-binding protein cytoplasmic 4 (inducible form); binds to poly(A); poly(U) and AU-rich regions of mRNA; positively regulates interleukin-2 (IL2) mRNA translation; may play a role in blood coagulation and RNA catabolism                           | HDL        | --           | 0.89                 |

| Gene Symbol | Description                                                                                                                                                                                                                                                    | Lead Trait | Other Traits | Fold $\Delta$ ApoA-I |
|-------------|----------------------------------------------------------------------------------------------------------------------------------------------------------------------------------------------------------------------------------------------------------------|------------|--------------|----------------------|
| PPP1R3B     | Protein phosphatase 1 regulatory subunit 3B; an enzyme activator that acts in glucose transport; premeiotic DNA synthesis; and skeletal muscle tissue development; involved in insulin receptor signaling pathway and regulation of glycogen biosynthesis      | HDL        | TC,LDL       | 0.83                 |
| CETP        | Cholesteryl ester transfer protein plasma; a cholesterol transporter that acts in cholesterol metabolism and homeostasis; upregulated in arteriosclerosis; coronary artery disease; type 1 diabetes mellitus; hypercholesterolemia; and xanthomatosis          | HDL        | TC,LDL,TG    | 0.81                 |
| LILRA3      | Leukocyte immunoglobulin-like receptor; a putative receptor that may play a role in defense response and signal transduction; gene deletion is associated with multiple sclerosis and Sjogren syndrome                                                         | HDL        | --           | 0.69                 |
| ABCA1       | ATP-binding cassette subfamily A member 1; a cholesterol transporter that acts in lipid metabolism; insulin secretion; and phagocytosis; gene polymorphism correlates with coronary artery disease; familial form of hypolipoproteinemias; and Tangier disease | HDL        | TC           | 0.66                 |
| LACTB       | Lactamase beta; a putative beta-lactamase and a structural constituent of ribosome that forms polymers into ordered filaments inside mitochondria                                                                                                              | HDL        | --           | 0.64                 |
| UBE2L3      | Ubiquitin-conjugating enzyme E2L 3; a transcriptional coactivator that is involved in ubiquitin-dependent protein catabolism; steroid hormone receptor signaling; and in utero embryonic development; genetic polymorphisms are associated with Crohn disease  | HDL        | --           | 0.63                 |
| CITED2      | Cbp-p300 interacting transactivator with Glu-Asp rich carboxy terminal domain 2; a transcriptional coactivator that mediates angiogenesis; hemopoiesis; neural tube formation; and organ development; gene mutations correlate with congenital heart defects   | HDL        | --           | 0.53                 |
| LIPC        | Lipase C; involved in lipid metabolism; fatty acid transport; and glucose metabolic process; aberrant protein activity correlates with type I diabetes mellitus and type II diabetes mellitus; mRNA expression is downregulated in coronary artery disease     | HDL        | TC,TG        | 0.50                 |
| KLF14       | Kruppel-like factor 14; a TGFbeta (TGFB1)-inducible protein that silences the TGFbeta receptor II (TGFB2) promoter via a corepressor complex containing mSin3A and HDAC2; may regulate expression of genes associated with adiposity and metabolism            | HDL        | --           | 0.49                 |

| Gene Symbol | Description                                                                                                                                                                                                                                                    | Lead Trait | Other Traits | Fold $\Delta$ ApoA-I |
|-------------|----------------------------------------------------------------------------------------------------------------------------------------------------------------------------------------------------------------------------------------------------------------|------------|--------------|----------------------|
| MVK         | Mevalonate kinase; acts in isoprenoid and cholesterol synthesis; downregulated in rhizomelic chondrodysplasia unctata; inborn metabolic errors; hypergammaglobulinemia; and Zellweger syndromes; gene mutation correlates with hepatocellular carcinoma        | HDL        | --           | 0.49                 |
| IRS1        | Insulin receptor substrate 1; an signal transducer; activates MAPK activity; aberrant expression is associated with arteriosclerosis; diabetes mellitus; insulin resistance; gestational diabetes; obesity; and prostatic and several other neoplasms          | HDL        | TG           | 0.43                 |
| STARD3      | StAR-related lipid transfer domain containing 3; acts in cholesterol transport; bile acid metabolism; and multivesicular body sorting pathway; aberrantly expressed in psoriasis; atopic dermatitis; and breast cancer; mRNA is upregulated in prostate cancer | HDL        | --           | 0.38                 |
| SBNO1       | Protein with very strong similarity to strawberry notch homolog 1 (mouse Sbn1); which exhibits induced expression in the developing nervous system by Reelin (mouse Rln); member of the helicase conserved C-terminal domain containing family                 | HDL        | --           | 0.35                 |
| LIPG        | Lipase endothelial; a triglyceride lipase that plays a role in high-density lipoprotein particle remodeling and cholesterol homeostasis; upregulated in arteriosclerosis; aberrant expression correlates with type 1 diabetes and fetal growth retardation     | HDL        | TC           | 0.26                 |
| CMIP        | c-Maf-inducing protein; a proximal signaling protein regulating T cell activation; Src phosphorylation; cytoskeleton reorganization; and distribution of cytoskeleton-associated L-plastin; may act in short term memory associated with language impairment   | HDL        | --           | 0.20                 |
| HNF4A       | Hepatocyte nuclear factor 4 alpha; a transcriptional coactivator that acts in hepatocyte differentiation and glucose metabolism; downregulated in Crohn disease; mRNA is overexpressed in hepatocellular carcinoma and SNP correlates with type 2 diabetes     | HDL        | TC           | 0.20                 |
| ARL15       | ADP-ribosylation factor-like 15; may play a role in determining circulating levels of adiponectin; gene SNP is associated with increased risk of coronary heart disease; gene duplication may be associated with childhood obesity                             | HDL        | --           | --                   |
| C19orf80    | Chromosome 19 open reading frame 80; gene hypermethylation is associated with hepatocellular carcinoma                                                                                                                                                         | HDL        | --           | --                   |
| TTC39B      | Tetratricopeptide repeat domain 39B; gene polymorphism may correlate with blood levels of high density lipoprotein cholesterol                                                                                                                                 | HDL        | TC           | --                   |

| Gene Symbol | Description                                                                                                                                                                                                                                                     | Lead Trait | Other Traits | Fold $\Delta$ ApoA-I |
|-------------|-----------------------------------------------------------------------------------------------------------------------------------------------------------------------------------------------------------------------------------------------------------------|------------|--------------|----------------------|
| ZNF648      | Protein containing ten zinc finger C2H2 type repeats; which bind nucleic acids; has a region of high similarity to a region of mouse Zfp2; which is a putative Kruppel-type zinc-finger transcription factor that may be required for neuronal development      | HDL        | --           | --                   |
| UBASH3B     | Cbl-interacting protein Sts-1; a CBL binding protein that regulates receptor mediated endocytosis                                                                                                                                                               | TC         | HDL          | --                   |
| KLHL8       | Kelch-like 8; component of an E3 ubiquitin ligase complex that regulates ubiquitination and stability of rapsyn (RAPSN)                                                                                                                                         | TG         | --           | 1.88                 |
| PLA2G6      | Phospholipase A2 group VI; a transferase that plays a role in cellular lipid metabolic process; calcium ion homeostasis; and mitochondrion organization; regulates cell cycle and cell migration; gene mutations are associated with neurodegenerative diseases | TG         | --           | 1.64                 |
| GCKR        | Glucokinase (hexokinase 4) regulator; a kinase inhibitor that regulates glucokinase translocation; functions in glucose metabolism; corresponding gene maps to a chromosomal region associated with obesity; polymorphism correlates with type II diabetes      | TG         | TC           | 1.47                 |
| ANGPTL3     | Angiopoietin-like 3; a phospholipase inhibitor that plays a role in cholesterol homeostasis and lipid storage; induces endothelial cell adhesion and migration; angiogenesis; and proteolysis; heterozygous mutation correlates with hypolipidemia              | TG         | TC,LDL       | 1.35                 |
| LRP1        | Low density lipoprotein-related protein 1; a receptor that acts in cell migration and lipoprotein metabolism; upregulated in malignancies; rheumatoid arthritis; and atherosclerosis; gene polymorphisms correlates with Alzheimer disease                      | TG         | HDL          | 1.28                 |
| TRIB1       | Tribbles homolog 1; a transcription cofactor that regulates RAR signaling; MAPK activation; and SMC proliferation; mRNA is upregulated in ischemic heart disease and downregulated in myeloid leukemia; gene mutation correlates with hypertriglyceridemia      | TG         | TC,LDL,HDL   | 1.27                 |
| COBLL1      | COBL-like 1; negatively regulates apoptosis; altered mRNA expression may correlate with survival probability associated with malignant pleural mesothelioma                                                                                                     | TG         | --           | 1.22                 |
| NAT2        | N-acetyltransferase 2 (arylamine N-acetyltransferase); catalyzes the reaction of acetyl-CoA and arylamine to CoA and N-acetylarylamine; gene polymorphisms are associated with arthritis; cataract; endometriosis; Parkinson disease; and several neoplasms     | TG         | TC           | 1.07                 |

| Gene Symbol | Description                                                                                                                                                                                                                                                     | Lead Trait | Other Traits | Fold $\Delta$ ApoA-I |
|-------------|-----------------------------------------------------------------------------------------------------------------------------------------------------------------------------------------------------------------------------------------------------------------|------------|--------------|----------------------|
| LPL         | Lipoprotein lipase; an hydrolase that acts in lipoprotein catabolism and blood circulation; gene polymorphism causes type 2 diabetes mellitus; hyperlipidemia; Alzheimer disease; hypertension; prostatic neoplasm; arteriosclerosis; and hypertriglyceridemia  | TG         | HDL          | 1.07                 |
| HLA-DRA     | Histocompatibility antigen HLA-DR alpha, acts in immune response and T cell differentiation, aberrantly expressed in autoimmune diseases and muscular dystrophy; gene polymorphism is associated with multiple sclerosis and IgA glomerulon                     | TG         | --           | 1.02                 |
| CTF1        | Cardiotrophin 1; a LIFR ligand that acts in MAPKK activation; cardiac muscle hypertrophy; cell death; and nervous system development; upregulated in heart and kidney failure; angina pectoris; metabolic syndrome X; and blood pressure                        | TG         | --           | 0.86                 |
| PINX1       | PIN2-TERF1 interacting telomerase inhibitor 1; a putative tumor suppressor that binds to and inhibits TERT telomerase; regulates mitotic chromosome congression and stability; decreased mRNA expression correlates with stomach neoplasms                      | TG         | --           | 0.83                 |
| MAP3K1      | Mitogen-activated protein kinase kinase kinase 1; a transcription coactivator that acts in keratinocyte differentiation; JNK cascade; and apoptosis; decreased processing correlates with ovarian neoplasms; gene polymorphism correlates with breast neoplasms | TG         | --           | 0.69                 |
| APOE        | Apolipoprotein E; a lipid transporter that plays a role in cholesterol metabolism; cell proliferation; and musculoskeletal movement; gene polymorphism correlates with Alzheimer disease; carotid artery diseases; diabetic angiopathies; and amnesia           | TG         | --           | 0.67                 |
| FADS1       | Fatty acid desaturase 1; a C-5 sterol desaturase that is involved in unsaturated fatty acid biosynthesis; may play a role in cell differentiation; upregulated in obesity; decreased mRNA expression correlates with psoriasis                                  | TG         | HDL,TC,LDL   | 0.65                 |
| CYP26A1     | Cytochrome P450 family 26 subfamily A polypeptide 1; a retinoic acid 4-hydroxylase that acts in neuron differentiation; anteroposterior patterning; and brain development; upregulated in ovarian cancer; mouse Cyp26a1 is associated with caudal agenesis      | TG         | --           | 0.64                 |
| JMJD1C      | Jumonji domain containing 1C; a transcriptional coactivator that interacts with androgen and glucocorticoid receptors; mRNA is downregulated in breast cancer; gene disruption correlates with autism                                                           | TG         | --           | 0.63                 |

| Gene Symbol | Description                                                                                                                                                                                                                                                  | Lead Trait | Other Traits | Fold $\Delta$ ApoA-I |
|-------------|--------------------------------------------------------------------------------------------------------------------------------------------------------------------------------------------------------------------------------------------------------------|------------|--------------|----------------------|
| APOB        | Apolipoprotein B; acts in cholesterol metabolism and absorption; aberrantly expressed in Alzheimer disease; AIDS; arthritis; diabetes; cardiac and pulmonary diseases; hypercholesterolemia; and hepatitis; mutation correlates with hypobetalipoproteinemia | TG         | HDL          | 0.42                 |
| MSL2        | Male-specific lethal 2 homolog; a component of a multisubunit histone acetyltransferase complex that mediates the majority of histone H4 acetylation at lysine 16; an MOF complex component and E3 ubiquitin ligase for H2B K34                              | TG         | --           | 0.38                 |
| CAPN3       | Calpain 3; a calcium-dependent cysteine-type endopeptidase that plays a role in skeletal muscle development; muscle contraction; visual perception; NF-kappaB cascade and cytolysis; gene mutations correlates with muscular dystrophy type 2A               | TG         | --           | 0.32                 |
| APOA1       | Apolipoprotein A-I; a cholesterol transporter that acts in cAMP biosynthesis and blood circulation; upregulated in Alzheimer disease; arthritis; arteriosclerosis; diabetes; and breast neoplasms; gene mutations cause amyloidosis and hypolipoproteinemia  | TG         | TC,HDL,LDL   | 0.14                 |
| FRMD5       | FERM domain containing 5; gene expression in glioblastoma cells is regulated by a TP53 R273H mutant; indicating a role in oncogenesis                                                                                                                        | TG         | --           | --                   |
